# Supplementary material for: Transcriptomic and iTRAQ-Based Quantitative Proteomic Analyses of inap CMS in Brassica napus L
Source: MDPI journal article supplement (doi:10.3390/plants11192460), 2022-09-21
Supplement: s1 [file s1]

**Table S1.** Statistics of RNA-seq reads and mapped reads

| <b>Samples</b>    | <b>Total clean reads</b> | <b>Mapping rates (%)</b> |
|-------------------|--------------------------|--------------------------|
| <b>inap-1 0-5</b> | 32060818                 | 89                       |
| <b>inap-2 0-5</b> | 32956722                 | 88.66                    |
| <b>inap-1 6-8</b> | 51566905                 | 88.05                    |
| <b>inap-2 6-8</b> | 28754207                 | 87.9                     |
| <b>H3-1 0-5</b>   | 32349064                 | 88.91                    |
| <b>H3-1 0-5</b>   | 31953791                 | 88.47                    |
| <b>H3-2 6-8</b>   | 37760788                 | 87.59                    |
| <b>H3-2 6-8</b>   | 29438485                 | 87.57                    |

**Table S3.** The main genes that may be involved in the occurrence of sterility were identified from the *inap* CMS and H3 maintainer line.

| Genes ID      | Description                                          | log <sub>2</sub> (Fold Change)<br>(Stage 0–5) | log <sub>2</sub> (Fold Change)<br>(Stage 6–8) | TAIR ID   |
|---------------|------------------------------------------------------|-----------------------------------------------|-----------------------------------------------|-----------|
| BnaCnng78420D | Floral meristem identity control protein LEAFY (LFY) | 2.422885432                                   |                                               | AT5G61850 |
| BnaC02g41870D | AGAMOUS-like 8 (AGL8)                                | 4.232514048                                   | 3.056685218                                   | AT5G60910 |
| BnaA09g36710D | AGAMOUS-like 18 (AGL18)                              | -2.163229327                                  | -2.779705885                                  | AT3G57390 |
| BnaC08g28320D | AGAMOUS-like 18 (AGL18)                              | -3.067970231                                  | -2.255123355                                  | AT3G57390 |
| BnaC04g24260D | AGAMOUS-like 18 (AGL18)                              |                                               | -2.128139777                                  | AT3G57390 |
| BnaA02g33230D | AGAMOUS-like 42 (AGL42)                              |                                               | 2.118124176                                   | AT5G62165 |
| BnaA03g04490D | AGAMOUS-like 15 (AGL15)                              |                                               | -2.017817741                                  | AT5G13790 |
| BnaC06g43410D | NAC-like, activated by AP3/PI (NAP)                  | -2.972590524                                  |                                               | AT1G69490 |
| BnaA07g24270D | NAC-like, activated by AP3/PI (NAP)                  | -2.215891592                                  |                                               | AT1G69490 |
| BnaA02g27790D | Anther-specific protein agp1-like                    | -2.035942335                                  |                                               | AT3G26110 |
| BnaA03g34370D | REPRODUCTIVE MERISTEM 22 (REM22)                     |                                               | -2.579005175                                  | AT3G17010 |
| BnaC03g39810D | REPRODUCTIVE MERISTEM 22 (REM22)                     |                                               | -2.4493508                                    | AT3G17010 |
| BnaA01g16350D | Sporocyteless (SPL)                                  |                                               | -2.521612076                                  | AT4G27330 |
| BnaA03g58770D | Sporocyteless (SPL)                                  |                                               | -2.273052532                                  | AT4G27330 |
| BnaC02g42720D | NAC domain containing protein 102                    | 2.829477416                                   |                                               | AT5G63790 |
| BnaC03g50150D | NAC domain containing protein 103                    | 2.49698767                                    |                                               | AT5G64060 |
| BnaA06g23210D | NAC domain containing protein 103                    | 2.851585785                                   |                                               | AT5G64060 |
| BnaC06g05920D | NAC domain containing protein 19                     | -2.477049138                                  |                                               | AT1G52890 |
| BnaC06g05910D | NAC domain containing protein 19                     | -2.22022182                                   |                                               | AT1G52890 |
| BnaC06g05930D | NAC domain containing protein 19                     | -2.114869872                                  |                                               | AT1G52890 |
| BnaA05g24050D | NAC domain containing protein 3                      | -3.920059147                                  | -2.416046987                                  | AT3G15500 |
| BnaC05g38150D | NAC domain containing protein 3                      | -3.323233529                                  |                                               | AT3G15500 |
| BnaC01g36040D | NAC domain containing protein 3                      | -2.925168843                                  |                                               | AT3G15500 |
| BnaA01g28930D | NAC domain containing protein 3                      | -2.237260187                                  |                                               | AT3G15500 |
| BnaC03g39160D | NAC domain containing protein 3                      |                                               | -2.361383318                                  | AT3G15500 |
| BnaA02g18390D | NAC domain containing protein 32                     | -3.192421125                                  |                                               | AT1G77450 |
| BnaC04g43920D | NAC domain containing protein 41                     | 2.09582245                                    |                                               | AT2G33480 |
| BnaC03g58370D | NAC domain containing protein 5                      | -3.060329332                                  | -2.644144979                                  | AT1G02250 |
| BnaC01g23890D | NAC domain containing protein 60                     | -2.096335244                                  |                                               | AT3G44290 |
| BnaA03g08460D | NAC domain containing protein 89                     | -3.394958545                                  |                                               | AT5G22290 |

| Genes ID      | Description                           | log <sub>2</sub> (Fold Change)<br>(Stage 0–5) | log <sub>2</sub> (Fold Change)<br>(Stage 6–8) | TAIR ID   |
|---------------|---------------------------------------|-----------------------------------------------|-----------------------------------------------|-----------|
| BnaC04g28060D | Cell wall invertase 2                 | -5.367356147                                  |                                               | AT3G52600 |
| BnaA04g05320D | Cell wall invertase 2                 | -4.693923179                                  |                                               | AT3G52600 |
| BnaC03g03990D | Cellulose synthase 5                  | 2.938271608                                   | 2.112034338                                   | AT5G09870 |
| BnaC02g43280D | Cellulose synthase 6                  | 4.424789884                                   | 3.115007843                                   | AT5G64740 |
| BnaC03g07610D | Cellulose synthase like A11           |                                               | 3.106490904                                   | AT5G16190 |
| BnaA04g18860D | Cellulose synthase-like B3            |                                               | 2.283646999                                   | AT2G32530 |
| BnaC04g11500D | Cellulose synthase-like D1            | -4.307104236                                  | -3.26897208                                   | AT2G33100 |
| BnaA05g10500D | Cellulose synthase-like D1            | -4.93043586                                   | -2.974262713                                  | AT2G33100 |
| BnaA03g27540D | Pectate lyase family protein          | -3.778280517                                  | -3.836891619                                  | AT3G01270 |
| BnaC03g32550D | Pectate lyase family protein          | -4.869386448                                  | -4.746838834                                  | AT3G01270 |
| BnaCnng05770D | Pectate lyase family protein          | -5.732177227                                  | -4.642224073                                  | AT3G01270 |
| BnaA06g09240D | Pectate lyase family protein          | -5.752539104                                  | -4.790405111                                  | AT1G14420 |
| BnaA08g23970D | Pectate lyase family protein          | -5.5734459                                    |                                               | AT1G14420 |
| BnaA09g57110D | Pectate lyase family protein          | -3.402143484                                  |                                               | AT1G14420 |
| BnaC05g10650D | Pectate lyase family protein          | -3.532419932                                  | -4.106068217                                  | AT1G14420 |
| BnaCnng60280D | Pectate lyase family protein          | -6.295459974                                  | -4.025722693                                  | AT1G14420 |
| BnaA02g13340D | Pectate lyase family protein          | 6.100979107                                   | 3.739166317                                   | AT1G67750 |
| BnaA07g38610D | Pectate lyase family protein          | 2.010340399                                   |                                               | AT1G67750 |
| BnaC06g26450D | Pectate lyase family protein          | 2.12949726                                    |                                               | AT1G67750 |
| BnaA09g19110D | Pectate lyase family protein          | -4.741376147                                  |                                               | AT2G02720 |
| BnaC02g34750D | Pectate lyase family protein          | -3.088415711                                  |                                               | AT2G02720 |
| BnaA02g26540D | Pectate lyase family protein          |                                               | -3.025813932                                  | AT2G02720 |
| BnaC03g06740D | Pectate lyase family protein          | -2.911216015                                  |                                               | AT5G15110 |
| BnaC07g49180D | Pectin lyase-like superfamily protein | -3.590797431                                  | -5.273654671                                  | AT5G48140 |
| BnaC02g38360D | Pectin lyase-like superfamily protein | -4.350583362                                  |                                               | AT5G48140 |
| BnaCnng71300D | Pectin lyase-like superfamily protein | -2.367164417                                  |                                               | AT5G48140 |
| BnaA06g30420D | Pectin lyase-like superfamily protein | -3.939181219                                  | -4.869246187                                  | AT5G48140 |
| BnaA03g30180D | Pectin lyase-like superfamily protein | -6.976506578                                  | -4.723351973                                  | AT3G07820 |
| BnaC03g35490D | Pectin lyase-like superfamily protein | -5.95358812                                   | -4.886626183                                  | AT3G07820 |
| BnaA03g34410D | Pectin lyase-like superfamily protein | -4.178772034                                  | -3.486297539                                  | AT3G17060 |
| BnaC03g39840D | Pectin lyase-like superfamily protein |                                               | -3.755300512                                  | AT3G17060 |

| Genes ID      | Description                                                         | log <sub>2</sub> (Fold Change)<br>(Stage 0–5) | log <sub>2</sub> (Fold Change)<br>(Stage 6–8) | TAIR ID   |
|---------------|---------------------------------------------------------------------|-----------------------------------------------|-----------------------------------------------|-----------|
| BnaA10g23870D | Pectin lyase-like superfamily protein                               | -3.265140545                                  | -3.167913772                                  | AT5G07420 |
| BnaAnng13710D | Pectin lyase-like superfamily protein                               | -4.869934432                                  |                                               | AT5G07430 |
| BnaC03g03040D | Pectin lyase-like superfamily protein                               | -3.095143279                                  |                                               | AT5G07430 |
| BnaA03g02030D | Pectin lyase-like superfamily protein                               | -4.225350425                                  |                                               | AT5G07430 |
| BnaA10g23860D | Pectin lyase-like superfamily protein                               | -3.144098861                                  |                                               | AT1G69940 |
| BnaA04g13950D | Pectin lyase-like superfamily protein                               | -2.834078822                                  |                                               | AT2G23900 |
| BnaC04g36920D | Pectin lyase-like superfamily protein                               | -2.215811826                                  |                                               | AT2G23900 |
| BnaA08g03570D | Pectin methylesterase inhibitor 1                                   | -4.85958817                                   | -2.478582113                                  | AT1G48020 |
| BnaC08g03920D | Pectin methylesterase inhibitor 1                                   | -2.303159602                                  | -2.438977969                                  | AT1G48020 |
| BnaC03g35940D | Pectinacetylerase family protein                                    | 2.304989484                                   |                                               | AT3G09410 |
| BnaC04g00460D | Plant invertase/pectin methylesterase inhibitor superfamily         | -6.102750562                                  | -5.965643044                                  | AT2G47040 |
| BnaC03g72420D | Plant invertase/pectin methylesterase inhibitor superfamily         | -6.439175372                                  | -5.576824961                                  | AT2G47040 |
| BnaA03g21590D | Plant invertase/pectin methylesterase inhibitor superfamily         | -5.671898519                                  | -5.322312634                                  | AT2G47040 |
| BnaA05g00810D | Plant invertase/pectin methylesterase inhibitor superfamily         | -3.601395582                                  | -2.676162028                                  | AT2G47040 |
| BnaCnng76410D | Plant invertase/pectin methylesterase inhibitor superfamily         | -7.506107772                                  |                                               | AT2G47040 |
| BnaA03g21600D | Plant invertase/pectin methylesterase inhibitor superfamily         | -5.246213818                                  | -2.449865139                                  | AT2G47050 |
| BnaA04g26890D | Plant invertase/pectin methylesterase inhibitor superfamily         | -5.672368939                                  | -3.877372715                                  | AT2G47050 |
| BnaA05g00800D | Plant invertase/pectin methylesterase inhibitor superfamily         | -5.342179271                                  | -3.545318833                                  | AT2G47050 |
| BnaC03g72430D | Plant invertase/pectin methylesterase inhibitor superfamily         | -4.715821267                                  | -2.223685475                                  | AT2G47050 |
| BnaC04g00440D | Plant invertase/pectin methylesterase inhibitor superfamily         | -3.102310853                                  | -2.834306908                                  | AT2G47050 |
| BnaC04g51500D | Plant invertase/pectin methylesterase inhibitor superfamily         | -5.415078998                                  | -3.536789256                                  | AT2G47050 |
| BnaA02g30620D | Plant invertase/pectin methylesterase inhibitor superfamily         | -6.132894432                                  | -5.235602479                                  | AT5G49180 |
| BnaCnng75130D | Plant invertase/pectin methylesterase inhibitor superfamily         | -5.560547779                                  | -3.479528155                                  | AT5G49180 |
| BnaC03g34350D | Plant invertase/pectin methylesterase inhibitor superfamily         | -3.798651411                                  | -3.443127276                                  | AT3G05610 |
| BnaA03g29100D | Plant invertase/pectin methylesterase inhibitor superfamily         | -5.252449814                                  | -3.092526921                                  | AT3G05610 |
| BnaC03g03910D | Plant invertase/pectin methylesterase inhibitor superfamily         | 4.787842609                                   | 3.231611726                                   | AT5G09760 |
| BnaC09g50270D | Plant invertase/pectin methylesterase inhibitor superfamily         | 3.538787103                                   |                                               | AT5G04970 |
| BnaA03g22710D | Plant invertase/pectin methylesterase inhibitor superfamily         | -5.339904456                                  | -2.792347273                                  | AT2G26450 |
| BnaC03g26740D | Plant invertase/pectin methylesterase inhibitor superfamily         | -4.67830567                                   |                                               | AT2G26450 |
| BnaA01g32580D | Plant invertase/pectin methylesterase inhibitor superfamily         | -2.251754798                                  |                                               | AT3G06830 |
| BnaC01g16500D | Plant invertase/pectin methylesterase inhibitor superfamily protein | -5.108883119                                  | -3.904508418                                  | AT4G24640 |

| Genes ID      | Description                                                         | log <sub>2</sub> (Fold Change)<br>(Stage 0–5) | log <sub>2</sub> (Fold Change)<br>(Stage 6–8) | TAIR ID   |
|---------------|---------------------------------------------------------------------|-----------------------------------------------|-----------------------------------------------|-----------|
| BnaA01g14010D | Plant invertase/pectin methylesterase inhibitor superfamily protein | -5.964558561                                  | -3.109305573                                  | AT4G24640 |
| BnaA06g06610D | Plant invertase/pectin methylesterase inhibitor superfamily protein | -4.748646549                                  | -2.41329798                                   | AT1G10770 |
| BnaA09g47760D | Plant invertase/pectin methylesterase inhibitor superfamily protein | -2.857821644                                  |                                               | AT1G10770 |
| BnaC05g08260D | Plant invertase/pectin methylesterase inhibitor superfamily protein |                                               | -2.049038167                                  | AT1G10770 |
| BnaA02g33370D | Plant invertase/pectin methylesterase inhibitor superfamily protein | 2.287802724                                   |                                               | AT5G62350 |
| BnaA09g00690D | Plant invertase/pectin methylesterase inhibitor superfamily protein | -3.957710589                                  |                                               | AT4G02250 |
| BnaCnng52530D | Plant invertase/pectin methylesterase inhibitor superfamily protein | -3.050811037                                  |                                               | AT1G23350 |
| BnaCnng57640D | Plant invertase/pectin methylesterase inhibitor superfamily protein | -2.758217485                                  |                                               | AT3G62180 |
| BnaA04g27250D | Plant invertase/pectin methylesterase inhibitor superfamily protein | -2.011299789                                  |                                               | AT3G62180 |
| BnaC06g36860D | SKU5 similar 5                                                      | 2.073564907                                   |                                               | AT1G76160 |
| BnaA05g25900D | SKU5 similar 12                                                     |                                               | -3.445459845                                  | AT1G55570 |
| BnaC05g39980D | SKU5 similar 12                                                     | -4.653275895                                  |                                               | AT1G55570 |
| BnaC03g37900D | SKU5 similar 12                                                     | -2.958159879                                  |                                               | AT1G55570 |
| BnaA03g32810D | SKU5 similar 13                                                     | -6.139936772                                  | -5.642868991                                  | AT3G13400 |
| BnaA05g25890D | SKU5 similar 13                                                     | -7.031067839                                  | -5.168883918                                  | AT3G13400 |
| BnaC01g37680D | SKU5 similar 13                                                     | -3.807186359                                  | -5.139840421                                  | AT3G13400 |
| BnaA01g29830D | SKU5 similar 13                                                     | -5.287851797                                  | -5.08860411                                   | AT3G13400 |
| BnaC05g39970D | SKU5 similar 13                                                     | -6.733978967                                  | -4.924595037                                  | AT3G13400 |
| BnaC03g37910D | SKU5 similar 13                                                     | -6.885571999                                  |                                               | AT3G13400 |
| BnaC03g70650D | SKU5 similar 14                                                     | -2.580045603                                  | -3.65879561                                   | AT1G55560 |

**Table S4. The main proteins that may be involved in the occurrence of sterility were identified from the *inap* CMS and H3 maintainer line.**

| DAPs ID             | Description                                                       | Mean Ratio | P-value   | TAIR ID   |
|---------------------|-------------------------------------------------------------------|------------|-----------|-----------|
| Glycosyl hydrolases |                                                                   |            |           |           |
| BnaC09g12230D       | Endoglucanase 6                                                   | 1.83       | 0.0001622 | AT1G64390 |
| BnaA02g17370D       | Endoglucanase 10                                                  | 1.42       | 0.01416   | AT1G75680 |
| BnaC04g08890D       | 1,4-alpha-glucan-branching enzyme 2-1, chloroplastic/amyloplastic | 0.83       | 0.006174  | AT2G36390 |
| BnaCnng30450D       | Beta-D-xylosidase 4                                               | 0.76       | 0.007854  | AT5G64570 |
| BnaAnng23050D       | Xyloglucan endotransglucosylase/hydrolase protein 24              | 0.68       | 0.007605  | AT4G30270 |
| Beta-galactosidases |                                                                   |            |           |           |
| BnaC08g28150D       | Glucan endo-1, 3-beta-glucosidase, acidic isoform                 | 1.61       | 0.02594   | AT3G57260 |
| BnaA05g14890D       | Beta-D-glucopyranosyl abscisate beta-glucosidase                  | 1.48       | 0.003734  | AT1G52400 |
| BnaC06g13950D       | Glucan endo-1, 3-beta-glucosidase 10                              | 1.42       | 0.01481   | AT5G42100 |
| BnaC05g06540D       | Mannosylglycoprotein endo-beta-mannosidase                        | 0.82       | 0.04935   | AT1G09010 |
| BnaA10g11860D       | Glucan endo-1, 3-beta-glucosidase 9                               | 0.82       | 0.02535   | AT5G58480 |
| BnaA01g34050D       | Probable inactive beta-glucosidase 25                             | 0.75       | 0.001293  | AT3G03640 |
| BnaC04g29090D       | Probable glucan endo-1, 3-beta-glucosidase A6                     | 0.58       | 0.003338  | AT4G14080 |
| BnaCnng35540D       | Probable glucan endo-1, 3-beta-glucosidase A6                     | 0.57       | 0.01051   | AT4G14080 |
| PCD                 |                                                                   |            |           |           |
| BnaC01g31810D       | Peroxidase 30                                                     | 1.75       | 0.02477   | AT3G21770 |
| BnaA07g32300D       | Thioredoxin-like protein CDSP32, chloroplastic                    | 1.26       | 0.001144  | AT1G76080 |
| Calcium ion         |                                                                   |            |           |           |
| BnaC04g34480D       | Calcium-binding protein CML24                                     | 1.54       | 0.01832   | AT5G37770 |
| BnaC03g61330D       | Calcium-transporting ATPase 2, plasma membrane-type               | 1.22       | 0.03131   | AT4G37640 |
| BnaC05g09500D       | Probable calcium-binding protein CML13                            | 0.81       | 0.01581   | AT1G12310 |
| BnaC04g34470D       | Calmodulin-4                                                      | 0.74       | 0.0003448 | AT1G66410 |
| BnaA03g39650D       | Calcium sensing receptor, chloroplastic                           | 0.63       | 0.02561   | AT5G23060 |

In order of Mean Ratio (*inap*-vs-H3), and the DAPs were identified at level of *P*-value < 0.05.

**Table S5. Primer sequences for the DAPs used in qRT-PCR assays and relative changes in expression.**

| DAPs ID       | Description                                            | Mean Ratio<br>(iTRAQ) | Regulation<br>( <i>inap</i> CMS vs H3) | Primer (5'–3')                                        |
|---------------|--------------------------------------------------------|-----------------------|----------------------------------------|-------------------------------------------------------|
| BnaA09g12770D | Elongation factor G, chloroplastic                     | 1.53                  | Up                                     | F-GAAGAGATTGGTGAGGAAAGGA<br>R-AGATAGTCAACCACAGCATCAA  |
| BnaA07g08200D | Pollen-specific protein-like                           | 0.48                  | Down                                   | F-GTAACGTTGACTAAAGAAGCCG<br>R-CTAACGGCGTTTTTAACCATGAA |
| BnaA03g58200D | Pollen-specific protein-like                           | 0.37                  | Down                                   | F-AAGAAGCTATGACCGACAAAGA<br>R-GTTAATGGTTCGAGTCTCGTTG  |
| BnaC08g23600D | ATP synthase subunit d, mitochondrial                  | 0.53                  | Down                                   | F-GTTCAAAGCTTCAAGGACGATT<br>R-TTGTACATGTCAACAATGCCAG  |
| BnaA10g24380D | D-lactate dehydrogenase [cytochrome],<br>mitochondrial | 0.65                  | Down                                   | F-ACAACACGGACTATTCTTTCCT<br>R-CTCCATTAGGAAGAACCACCTT  |
| BnaA05g29810D | Exopolygalacturonase clone GBGA483                     | 0.63                  | Down                                   | F-AACACCAACAACGATTACAGTG<br>R-GATTGCCATGCATATCGAAAGT  |
| BnaA03g04340D | ATP synthase subunit O, mitochondrial                  | 0.56                  | Down                                   | F-GAGAGATTATGCAACAGCTTCG<br>R-CGAGTCTTGTCTCTCTAGGAAC  |
| BnaC02g00700D | Probable pectinesterase/pectinesterase inhibitor 51    | 0.8                   | Down                                   | F-CGGAGGAGTACATGAAACTGTA<br>R-ACTCTCCATAATACAGCGTCTG  |
| BnaC01g39610D | Polygalacturonase                                      | 0.42                  | Down                                   | F-GTTAAGAACTGTACCCTCGAGG<br>R-GGATTGGGTTGCTAACTTTGTT  |
| BnaCnng35540D | Probable glucan endo-1, 3-beta-glucosidase A6          | 0.57                  | Down                                   | F-GTTCTGTTCCCTCTTCACTCTCA<br>R-CTACTTGCGAGTGATGACAATG |
| BnaA10g24240D | Peroxidase 53                                          | 0.61                  | Down                                   | F-TCTTGATCTGAGCACACCTGAC<br>R-AGACTCTGGTTACTTGCGAAGG  |
| BnaA03g39650D | Calcium sensing receptor, chloroplastic                | 0.63                  | Down                                   | F-AATCAACAAAGGCTCCAACATC<br>R-AGAAGCTGCTGGTATAATCCTC  |
| Actin         |                                                        |                       |                                        | F-CTGTGCCAATCTACGAGGGT<br>R-CTTACAATTTCCCGCTCTGCT     |

**Table S6.** Comparison of gene and protein expression ratios between the transcriptomic (RNA-Seq) and proteomic (iTRAQ) analysis.

| Gene/Protein ID | log <sub>2</sub> (Fold Change)<br>(0–5 DEGs) | log <sub>2</sub> (Fold Change)<br>(6–8 DEGs) | lnap/H3@Mean Ratio<br>(iTRAQ) | Annotation                                                |
|-----------------|----------------------------------------------|----------------------------------------------|-------------------------------|-----------------------------------------------------------|
| BnaC08g42050D   | -3.53                                        |                                              | 0.52                          | Thioredoxin domain-containing protein                     |
| BnaA09g18440D   | -2.94                                        |                                              | 0.61                          | Acetyl-CoA acetyltransferase                              |
| BnaC07g25330D   | -2.70                                        |                                              | 0.56                          | DUF1216 domain-containing protein                         |
| BnaA02g05310D   | -2.66                                        |                                              | 0.69                          | AMPKBI domain-containing protein                          |
| BnaA06g31290D   | -2.45                                        |                                              | 0.53                          | Uncharacterized protein                                   |
| BnaC09g37560D   | -2.39                                        | -2.23                                        | 0.82                          | Phytoeyanin domain-containing protein                     |
| BnaA10g04490D   | -2.33                                        |                                              | 0.64                          | Uncharacterized protein                                   |
| BnaA08g00900D   | -2.18                                        |                                              | 0.72                          | Aldehyde dehydrogenase family 7 member A1                 |
| BnaC03g18820D   | -2.15                                        |                                              | 0.46                          | Auxin-repressed 12.5 kDa protein                          |
| BnaC03g69760D   | -2.14                                        |                                              | 0.75                          | Persulfide dioxygenase ETHE1 homolog, mitochondrial       |
| BnaC03g40460D   | 2.06                                         |                                              | 2.09                          | Non uncharacterized protein specific lipid                |
| BnaC03g36340D   | 2.12                                         |                                              | 1.56                          | Class-III pyridoxal-phosphate-dependent aminotransferase  |
| BnaC01g30760D   | 2.23                                         |                                              | 2.01                          | Uncharacterized protein                                   |
| BnaC06g34250D   | 2.24                                         |                                              | 2.48                          | Protease inhibitor I3 family                              |
| BnaC02g00130D   | 2.32                                         |                                              | 0.67                          | Protein aspartic protease in guard cell 2                 |
| BnaAnng00260D   | 2.33                                         |                                              | 1.48                          | Aspartic proteinase PCS1                                  |
| BnaC04g39350D   | 2.38                                         |                                              | 1.29                          | Histone deacetylase HDT4                                  |
| BnaC01g31810D   | 2.48                                         | 2.04                                         | 1.75                          | Peroxidase 30                                             |
| BnaC03g06120D   | 2.55                                         | 2.01                                         | 1.5                           | Chalcone synthase 3                                       |
| BnaA02g05650D   | 2.95                                         |                                              | 1.73                          | Uncharacterized protein                                   |
| BnaC06g12160D   | 3.79                                         |                                              | 1.37                          | Diacylglycerol O-acyltransferase WSD1                     |
| BnaA04g22080D   | 3.87                                         | 2.67                                         | 1.62                          | Non-specific lipid-transfer protein A                     |
| BnaCnng01440D   | 3.94                                         | 4.26                                         | 1.64                          | Pept_C1 domain-containing protein                         |
| BnaA02g12440D   | 4.21                                         | 4.65                                         | 1.4                           | Glycosyl hydrolase 17 family                              |
| BnaC06g10100D   | 4.22                                         |                                              | 1.45                          | WD40 repeat                                               |
| BnaA10g22800D   | 4.35                                         |                                              | 1.25                          | Flavonol synthase/flavanone 3-hydroxylase                 |
| BnaC06g37960D   | 4.94                                         | 2.45                                         | 1.43                          | Probable acyl Uncharacterized protein activating enzyme 4 |
| BnaA06g35420D   |                                              | -2.29                                        | 0.32                          | 14.7 kDa heat shock protein                               |
| BnaA09g53230D   |                                              | 2.39                                         | 1.35                          | ADP-ribosylation factor GTPase-activating protein AGD2    |
| BnaA01g08120D   |                                              | 2.41                                         | 1.62                          | GDSL esterase/lipase                                      |
| BnaA05g25900D   |                                              | -3.45                                        | 0.53                          | L-ascorbate oxidase homolog                               |
| BnaA02g16610D   |                                              | 2.77                                         | 0.83                          | Uridine-cytidine kinase C                                 |
