# Supplementary material for: Transcriptomic and iTRAQ-Based Quantitative Proteomic Analyses of inap CMS in Brassica napus L
Source: Plants (Basel). 2022 Sep 21;11(19):2460. doi: 10.3390/plants11192460 (PMC9571993; doi:10.3390/plants11192460)
Supplement: Supplementary file 1 [file plants-11-02460-s001.zip › Supplementary Table 2.xlsx]

## Sheet: 0-5 stage_DEGs_GO
Class	GO_Name	GO_ID	GO_Level	P_value	EnrichmentScore	HitsGenesCountsInSelectedSet	HitsGenesCountsInBackground	AllGenesCountsInSelectedSet	AllGenesCountsInBackground	GenesOfSelectedSetInGOterm	corrected p-value(BH method)
Biological process	response to wounding	GO:0009611	4	0	3.11638	71	980	948	40778	GSBRNA2T00023254001,GSBRNA2T00034313001,GSBRNA2T00048673001,GSBRNA2T00148277001,GSBRNA2T00107313001,GSBRNA2T00139596001,GSBRNA2T00027621001,GSBRNA2T00138749001,GSBRNA2T00129716001,GSBRNA2T00136540001,GSBRNA2T00065785001,GSBRNA2T00034971001,GSBRNA2T00142002001,GSBRNA2T00132220001,GSBRNA2T00099637001,GSBRNA2T00072713001,GSBRNA2T00121422001,GSBRNA2T00104891001,GSBRNA2T00016167001,GSBRNA2T00118673001…	0
Biological process	response to jasmonic acid	GO:0009753	6	0	3.14339	76	1040	948	40778	GSBRNA2T00023254001,GSBRNA2T00034313001,GSBRNA2T00048673001,GSBRNA2T00015003001,GSBRNA2T00154860001,GSBRNA2T00139596001,GSBRNA2T00061907001,GSBRNA2T00138749001,GSBRNA2T00129716001,GSBRNA2T00034971001,GSBRNA2T00142002001,GSBRNA2T00132220001,GSBRNA2T00035196001,GSBRNA2T00150502001,GSBRNA2T00041679001,GSBRNA2T00099637001,GSBRNA2T00037127001,GSBRNA2T00072713001,GSBRNA2T00106217001,GSBRNA2T00121422001…	0
Biological process	response to stimulus	GO:0050896	2	0	1.31348	565	18503	948	40778	GSBRNA2T00023254001,GSBRNA2T00015907001,GSBRNA2T00056225001,GSBRNA2T00034313001,GSBRNA2T00107133001,GSBRNA2T00011672001,GSBRNA2T00048673001,GSBRNA2T00033572001,GSBRNA2T00048272001,GSBRNA2T00113662001,GSBRNA2T00112565001,GSBRNA2T00060160001,GSBRNA2T00049770001,GSBRNA2T00093269001,GSBRNA2T00004321001,GSBRNA2T00082473001,GSBRNA2T00138840001,GSBRNA2T00015003001,GSBRNA2T00136396001,GSBRNA2T00137481001…	0
Biological process	response to oxygen-containing compound	GO:1901700	4	1.11022e-16	1.77644	257	6223	948	40778	GSBRNA2T00023254001,GSBRNA2T00015907001,GSBRNA2T00034313001,GSBRNA2T00011672001,GSBRNA2T00048673001,GSBRNA2T00033572001,GSBRNA2T00113662001,GSBRNA2T00049770001,GSBRNA2T00082473001,GSBRNA2T00138840001,GSBRNA2T00015003001,GSBRNA2T00136396001,GSBRNA2T00158101001,GSBRNA2T00142798001,GSBRNA2T00154860001,GSBRNA2T00046594001,GSBRNA2T00091810001,GSBRNA2T00061592001,GSBRNA2T00047327001,GSBRNA2T00106945001…	7.80209e-14
Biological process	response to karrikin	GO:0080167	4	4.44089e-16	4.5606	44	415	948	40778	GSBRNA2T00056225001,GSBRNA2T00049770001,GSBRNA2T00015003001,GSBRNA2T00137481001,GSBRNA2T00146276001,GSBRNA2T00108884001,GSBRNA2T00145155001,GSBRNA2T00016009001,GSBRNA2T00153841001,GSBRNA2T00017007001,GSBRNA2T00069346001,GSBRNA2T00109174001,GSBRNA2T00016184001,GSBRNA2T00105135001,GSBRNA2T00106930001,GSBRNA2T00065032001,GSBRNA2T00132659001,GSBRNA2T00129416001,GSBRNA2T00023872001,GSBRNA2T00066571001…	2.49667e-13
Biological process	response to acid chemical	GO:0001101	4	2.77556e-15	1.79106	183	4395	948	40778	GSBRNA2T00023254001,GSBRNA2T00034313001,GSBRNA2T00011672001,GSBRNA2T00048673001,GSBRNA2T00033572001,GSBRNA2T00049770001,GSBRNA2T00015003001,GSBRNA2T00158101001,GSBRNA2T00142798001,GSBRNA2T00154860001,GSBRNA2T00046594001,GSBRNA2T00091810001,GSBRNA2T00106945001,GSBRNA2T00107313001,GSBRNA2T00068379001,GSBRNA2T00066740001,GSBRNA2T00102026001,GSBRNA2T00139596001,GSBRNA2T00053839001,GSBRNA2T00038118001…	1.30035e-12
Biological process	response to organic substance	GO:0010033	4	1.09912e-14	1.54725	271	7534	948	40778	GSBRNA2T00023254001,GSBRNA2T00015907001,GSBRNA2T00034313001,GSBRNA2T00011672001,GSBRNA2T00048673001,GSBRNA2T00048272001,GSBRNA2T00113662001,GSBRNA2T00049770001,GSBRNA2T00004321001,GSBRNA2T00082473001,GSBRNA2T00138840001,GSBRNA2T00015003001,GSBRNA2T00136396001,GSBRNA2T00142798001,GSBRNA2T00154860001,GSBRNA2T00146276001,GSBRNA2T00046594001,GSBRNA2T00108884001,GSBRNA2T00091810001,GSBRNA2T00018440001…	4.41376e-12
Biological process	flavonoid biosynthetic process	GO:0009813	5	4.69624e-14	4.98066	33	285	948	40778	GSBRNA2T00078939001,GSBRNA2T00048673001,GSBRNA2T00015003001,GSBRNA2T00108884001,GSBRNA2T00016009001,GSBRNA2T00143167001,GSBRNA2T00077286001,GSBRNA2T00069346001,GSBRNA2T00072713001,GSBRNA2T00129251001,GSBRNA2T00143309001,GSBRNA2T00106930001,GSBRNA2T00148001001,GSBRNA2T00014739001,GSBRNA2T00141706001,GSBRNA2T00078955001,GSBRNA2T00038144001,GSBRNA2T00117036001,GSBRNA2T00149646001,GSBRNA2T00129952001…	1.65014e-11
Biological process	response to chemical	GO:0042221	3	6.08402e-14	1.41762	350	10620	948	40778	GSBRNA2T00023254001,GSBRNA2T00015907001,GSBRNA2T00034313001,GSBRNA2T00011672001,GSBRNA2T00048673001,GSBRNA2T00033572001,GSBRNA2T00048272001,GSBRNA2T00113662001,GSBRNA2T00049770001,GSBRNA2T00004321001,GSBRNA2T00082473001,GSBRNA2T00138840001,GSBRNA2T00015003001,GSBRNA2T00136396001,GSBRNA2T00158101001,GSBRNA2T00142798001,GSBRNA2T00154860001,GSBRNA2T00090597001,GSBRNA2T00146276001,GSBRNA2T00046594001…	1.90024e-11
Biological process	response to chitin	GO:0010200	6	2.51021e-13	3.57794	45	541	948	40778	GSBRNA2T00034313001,GSBRNA2T00142798001,GSBRNA2T00154860001,GSBRNA2T00107313001,GSBRNA2T00136367001,GSBRNA2T00077229001,GSBRNA2T00041679001,GSBRNA2T00052329001,GSBRNA2T00104891001,GSBRNA2T00099375001,GSBRNA2T00105168001,GSBRNA2T00079836001,GSBRNA2T00007141001,GSBRNA2T00050942001,GSBRNA2T00045201001,GSBRNA2T00138277001,GSBRNA2T00054775001,GSBRNA2T00104568001,GSBRNA2T00132030001,GSBRNA2T00096312001…	7.05621e-11
Biological process	response to abiotic stimulus	GO:0009628	3	9.64562e-13	1.50615	261	7454	948	40778	GSBRNA2T00023254001,GSBRNA2T00056225001,GSBRNA2T00011672001,GSBRNA2T00033572001,GSBRNA2T00049770001,GSBRNA2T00093269001,GSBRNA2T00004321001,GSBRNA2T00015003001,GSBRNA2T00136396001,GSBRNA2T00137481001,GSBRNA2T00158101001,GSBRNA2T00107833001,GSBRNA2T00154860001,GSBRNA2T00123534001,GSBRNA2T00146276001,GSBRNA2T00046594001,GSBRNA2T00028840001,GSBRNA2T00108884001,GSBRNA2T00087850001,GSBRNA2T00106863001…	2.46489e-10
Biological process	response to hormone	GO:0009725	5	1.21636e-12	1.58116	220	5985	948	40778	GSBRNA2T00023254001,GSBRNA2T00015907001,GSBRNA2T00034313001,GSBRNA2T00011672001,GSBRNA2T00048673001,GSBRNA2T00113662001,GSBRNA2T00049770001,GSBRNA2T00004321001,GSBRNA2T00082473001,GSBRNA2T00138840001,GSBRNA2T00015003001,GSBRNA2T00142798001,GSBRNA2T00154860001,GSBRNA2T00046594001,GSBRNA2T00108884001,GSBRNA2T00091810001,GSBRNA2T00018440001,GSBRNA2T00047327001,GSBRNA2T00106945001,GSBRNA2T00107313001…	2.84932e-10
Biological process	flavonoid metabolic process	GO:0009812	4	1.47815e-12	4.07508	36	380	948	40778	GSBRNA2T00078939001,GSBRNA2T00048673001,GSBRNA2T00015003001,GSBRNA2T00108884001,GSBRNA2T00016009001,GSBRNA2T00102026001,GSBRNA2T00143167001,GSBRNA2T00014233001,GSBRNA2T00077286001,GSBRNA2T00069346001,GSBRNA2T00072713001,GSBRNA2T00129251001,GSBRNA2T00143309001,GSBRNA2T00106930001,GSBRNA2T00148001001,GSBRNA2T00014739001,GSBRNA2T00141706001,GSBRNA2T00066298001,GSBRNA2T00078955001,GSBRNA2T00038144001…	3.19622e-10
Biological process	response to endogenous stimulus	GO:0009719	3	1.83538e-11	1.5355	221	6191	948	40778	GSBRNA2T00023254001,GSBRNA2T00015907001,GSBRNA2T00034313001,GSBRNA2T00011672001,GSBRNA2T00048673001,GSBRNA2T00048272001,GSBRNA2T00113662001,GSBRNA2T00049770001,GSBRNA2T00004321001,GSBRNA2T00082473001,GSBRNA2T00138840001,GSBRNA2T00015003001,GSBRNA2T00142798001,GSBRNA2T00154860001,GSBRNA2T00046594001,GSBRNA2T00108884001,GSBRNA2T00091810001,GSBRNA2T00018440001,GSBRNA2T00047327001,GSBRNA2T00106945001…	3.68517e-09
Biological process	cellular response to jasmonic acid stimulus	GO:0071395	7	2.38415e-11	3.3465	41	527	948	40778	GSBRNA2T00034313001,GSBRNA2T00015003001,GSBRNA2T00139596001,GSBRNA2T00034971001,GSBRNA2T00142002001,GSBRNA2T00132220001,GSBRNA2T00041679001,GSBRNA2T00099637001,GSBRNA2T00037127001,GSBRNA2T00106217001,GSBRNA2T00104891001,GSBRNA2T00079836001,GSBRNA2T00016167001,GSBRNA2T00054775001,GSBRNA2T00136878001,GSBRNA2T00132221001,GSBRNA2T00078955001,GSBRNA2T00076869001,GSBRNA2T00156015001,GSBRNA2T00136837001…	4.46789e-09
Biological process	pollen tube development	GO:0048868	4	5.69873e-11	3.19756	42	565	948	40778	GSBRNA2T00156918001,GSBRNA2T00107313001,GSBRNA2T00085697001,GSBRNA2T00081068001,GSBRNA2T00153670001,GSBRNA2T00137261001,GSBRNA2T00062229001,GSBRNA2T00031936001,GSBRNA2T00048662001,GSBRNA2T00150081001,GSBRNA2T00089134001,GSBRNA2T00008436001,GSBRNA2T00143966001,GSBRNA2T00136135001,GSBRNA2T00016475001,GSBRNA2T00129640001,GSBRNA2T00112015001,GSBRNA2T00128143001,GSBRNA2T00024443001,GSBRNA2T00112105001…	1.0012e-08
Biological process	response to drug	GO:0042493	4	1.00359e-10	1.92225	106	2372	948	40778	GSBRNA2T00023254001,GSBRNA2T00034313001,GSBRNA2T00138840001,GSBRNA2T00142798001,GSBRNA2T00154860001,GSBRNA2T00090597001,GSBRNA2T00047327001,GSBRNA2T00107313001,GSBRNA2T00102714001,GSBRNA2T00066740001,GSBRNA2T00139596001,GSBRNA2T00027621001,GSBRNA2T00129716001,GSBRNA2T00116787001,GSBRNA2T00138512001,GSBRNA2T00142002001,GSBRNA2T00132220001,GSBRNA2T00035196001,GSBRNA2T00136367001,GSBRNA2T00150502001…	1.65946e-08
Biological process	response to stress	GO:0006950	3	1.27224e-10	1.36204	327	10327	948	40778	GSBRNA2T00023254001,GSBRNA2T00015907001,GSBRNA2T00056225001,GSBRNA2T00034313001,GSBRNA2T00011672001,GSBRNA2T00048673001,GSBRNA2T00033572001,GSBRNA2T00113662001,GSBRNA2T00112565001,GSBRNA2T00060160001,GSBRNA2T00049770001,GSBRNA2T00093269001,GSBRNA2T00004321001,GSBRNA2T00138840001,GSBRNA2T00015003001,GSBRNA2T00158101001,GSBRNA2T00153227001,GSBRNA2T00154860001,GSBRNA2T00148277001,GSBRNA2T00146276001…	1.98682e-08
Biological process	response to water	GO:0009415	5	1.73346e-09	2.13738	72	1449	948	40778	GSBRNA2T00011672001,GSBRNA2T00033572001,GSBRNA2T00049770001,GSBRNA2T00158101001,GSBRNA2T00154860001,GSBRNA2T00066740001,GSBRNA2T00102026001,GSBRNA2T00139596001,GSBRNA2T00053839001,GSBRNA2T00034108001,GSBRNA2T00127041001,GSBRNA2T00050955001,GSBRNA2T00055848001,GSBRNA2T00099955001,GSBRNA2T00014233001,GSBRNA2T00053135001,GSBRNA2T00077229001,GSBRNA2T00106217001,GSBRNA2T00006656001,GSBRNA2T00043731001…	2.5646e-07
Biological process	response to carbohydrate	GO:0009743	5	2.27289e-09	2.96916	39	565	948	40778	GSBRNA2T00015907001,GSBRNA2T00015003001,GSBRNA2T00136396001,GSBRNA2T00046594001,GSBRNA2T00061592001,GSBRNA2T00126659001,GSBRNA2T00129716001,GSBRNA2T00143096001,GSBRNA2T00077229001,GSBRNA2T00047471001,GSBRNA2T00090500001,GSBRNA2T00134741001,GSBRNA2T00016028001,GSBRNA2T00058021001,GSBRNA2T00060722001,GSBRNA2T00107195001,GSBRNA2T00036935001,GSBRNA2T00080792001,GSBRNA2T00055389001,GSBRNA2T00093449001…	2.90413e-07
Biological process	cellular amino acid catabolic process	GO:0009063	8	2.20579e-09	4.93612	21	183	948	40778	GSBRNA2T00064018001,GSBRNA2T00065785001,GSBRNA2T00011530001,GSBRNA2T00073644001,GSBRNA2T00154709001,GSBRNA2T00066145001,GSBRNA2T00107195001,GSBRNA2T00041456001,GSBRNA2T00031741001,GSBRNA2T00052478001,GSBRNA2T00004432001,GSBRNA2T00004542001,GSBRNA2T00009793001,GSBRNA2T00150971001,GSBRNA2T00058113001,GSBRNA2T00041448001,GSBRNA2T00032032001,GSBRNA2T00014014001,GSBRNA2T00122127001,GSBRNA2T00156224001…	2.9526e-07
Biological process	response to water deprivation	GO:0009414	6	2.1397e-09	2.14019	71	1427	948	40778	GSBRNA2T00011672001,GSBRNA2T00033572001,GSBRNA2T00049770001,GSBRNA2T00158101001,GSBRNA2T00154860001,GSBRNA2T00066740001,GSBRNA2T00102026001,GSBRNA2T00139596001,GSBRNA2T00053839001,GSBRNA2T00034108001,GSBRNA2T00127041001,GSBRNA2T00050955001,GSBRNA2T00055848001,GSBRNA2T00099955001,GSBRNA2T00014233001,GSBRNA2T00053135001,GSBRNA2T00077229001,GSBRNA2T00106217001,GSBRNA2T00006656001,GSBRNA2T00154474001…	3.00735e-07
Biological process	response to light stimulus	GO:0009416	5	6.92071e-09	1.77295	107	2596	948	40778	GSBRNA2T00056225001,GSBRNA2T00049770001,GSBRNA2T00136396001,GSBRNA2T00137481001,GSBRNA2T00107833001,GSBRNA2T00123534001,GSBRNA2T00046594001,GSBRNA2T00108884001,GSBRNA2T00107313001,GSBRNA2T00145155001,GSBRNA2T00079516001,GSBRNA2T00102714001,GSBRNA2T00139596001,GSBRNA2T00153841001,GSBRNA2T00129716001,GSBRNA2T00077286001,GSBRNA2T00069346001,GSBRNA2T00063249001,GSBRNA2T00150502001,GSBRNA2T00018525001…	8.45831e-07
Biological process	alpha-amino acid catabolic process	GO:1901606	9	1.08538e-08	4.98342	19	164	948	40778	GSBRNA2T00064018001,GSBRNA2T00065785001,GSBRNA2T00011530001,GSBRNA2T00073644001,GSBRNA2T00154709001,GSBRNA2T00066145001,GSBRNA2T00041456001,GSBRNA2T00031741001,GSBRNA2T00052478001,GSBRNA2T00004432001,GSBRNA2T00004542001,GSBRNA2T00009793001,GSBRNA2T00150971001,GSBRNA2T00058113001,GSBRNA2T00041448001,GSBRNA2T00032032001,GSBRNA2T00122127001,GSBRNA2T00156224001,GSBRNA2T00138774001,	1.27125e-06
Biological process	pollen tube growth	GO:0009860	7	1.24406e-08	3.11291	33	456	948	40778	GSBRNA2T00156918001,GSBRNA2T00085697001,GSBRNA2T00081068001,GSBRNA2T00137261001,GSBRNA2T00048662001,GSBRNA2T00150081001,GSBRNA2T00089134001,GSBRNA2T00008436001,GSBRNA2T00136135001,GSBRNA2T00016475001,GSBRNA2T00129640001,GSBRNA2T00128143001,GSBRNA2T00024443001,GSBRNA2T00112105001,GSBRNA2T00074448001,GSBRNA2T00132123001,GSBRNA2T00140403001,GSBRNA2T00054382001,GSBRNA2T00136136001,GSBRNA2T00006359001…	1.39882e-06
Biological process	carboxylic acid catabolic process	GO:0046395	7	3.03162e-08	3.20209	30	403	948	40778	GSBRNA2T00064018001,GSBRNA2T00134772001,GSBRNA2T00065785001,GSBRNA2T00011530001,GSBRNA2T00073644001,GSBRNA2T00105598001,GSBRNA2T00154709001,GSBRNA2T00066145001,GSBRNA2T00107195001,GSBRNA2T00041456001,GSBRNA2T00031741001,GSBRNA2T00052478001,GSBRNA2T00004432001,GSBRNA2T00004542001,GSBRNA2T00072383001,GSBRNA2T00009793001,GSBRNA2T00150971001,GSBRNA2T00033460001,GSBRNA2T00089594001,GSBRNA2T00021681001…	3.15625e-06
Biological process	organic acid catabolic process	GO:0016054	5	3.03162e-08	3.20209	30	403	948	40778	GSBRNA2T00064018001,GSBRNA2T00134772001,GSBRNA2T00065785001,GSBRNA2T00011530001,GSBRNA2T00073644001,GSBRNA2T00105598001,GSBRNA2T00154709001,GSBRNA2T00066145001,GSBRNA2T00107195001,GSBRNA2T00041456001,GSBRNA2T00031741001,GSBRNA2T00052478001,GSBRNA2T00004432001,GSBRNA2T00004542001,GSBRNA2T00072383001,GSBRNA2T00009793001,GSBRNA2T00150971001,GSBRNA2T00033460001,GSBRNA2T00089594001,GSBRNA2T00021681001…	3.15625e-06
Biological process	pollination	GO:0009856	3	2.99896e-08	2.52017	44	751	948	40778	GSBRNA2T00156918001,GSBRNA2T00107313001,GSBRNA2T00085697001,GSBRNA2T00081068001,GSBRNA2T00153670001,GSBRNA2T00137261001,GSBRNA2T00062229001,GSBRNA2T00031936001,GSBRNA2T00095197001,GSBRNA2T00048662001,GSBRNA2T00009018001,GSBRNA2T00150081001,GSBRNA2T00089134001,GSBRNA2T00008436001,GSBRNA2T00143966001,GSBRNA2T00136135001,GSBRNA2T00016475001,GSBRNA2T00129640001,GSBRNA2T00112015001,GSBRNA2T00128143001…	3.24234e-06
Biological process	response to radiation	GO:0009314	4	4.62425e-08	1.70356	108	2727	948	40778	GSBRNA2T00056225001,GSBRNA2T00049770001,GSBRNA2T00136396001,GSBRNA2T00137481001,GSBRNA2T00107833001,GSBRNA2T00123534001,GSBRNA2T00046594001,GSBRNA2T00108884001,GSBRNA2T00107313001,GSBRNA2T00145155001,GSBRNA2T00079516001,GSBRNA2T00102714001,GSBRNA2T00139596001,GSBRNA2T00153841001,GSBRNA2T00129716001,GSBRNA2T00077286001,GSBRNA2T00069346001,GSBRNA2T00063249001,GSBRNA2T00150502001,GSBRNA2T00018525001…	4.48233e-06
Biological process	multi-multicellular organism process	GO:0044706	3	5.47559e-08	2.4676	44	767	948	40778	GSBRNA2T00156918001,GSBRNA2T00107313001,GSBRNA2T00085697001,GSBRNA2T00081068001,GSBRNA2T00153670001,GSBRNA2T00137261001,GSBRNA2T00062229001,GSBRNA2T00031936001,GSBRNA2T00095197001,GSBRNA2T00048662001,GSBRNA2T00009018001,GSBRNA2T00150081001,GSBRNA2T00089134001,GSBRNA2T00008436001,GSBRNA2T00143966001,GSBRNA2T00136135001,GSBRNA2T00016475001,GSBRNA2T00129640001,GSBRNA2T00112015001,GSBRNA2T00128143001…	5.13063e-06
Biological process	multi-organism process	GO:0051704	2	1.24537e-07	1.45003	182	5399	948	40778	GSBRNA2T00023254001,GSBRNA2T00034313001,GSBRNA2T00112565001,GSBRNA2T00060160001,GSBRNA2T00015003001,GSBRNA2T00146276001,GSBRNA2T00101507001,GSBRNA2T00143311001,GSBRNA2T00156918001,GSBRNA2T00107313001,GSBRNA2T00139596001,GSBRNA2T00061907001,GSBRNA2T00033413001,GSBRNA2T00027621001,GSBRNA2T00138749001,GSBRNA2T00053336001,GSBRNA2T00127041001,GSBRNA2T00086269001,GSBRNA2T00138120001,GSBRNA2T00129716001…	1.12927e-05
Biological process	jasmonic acid mediated signaling pathway	GO:0009867	7	1.32011e-07	2.81644	33	504	948	40778	GSBRNA2T00015003001,GSBRNA2T00139596001,GSBRNA2T00034971001,GSBRNA2T00041679001,GSBRNA2T00099637001,GSBRNA2T00037127001,GSBRNA2T00106217001,GSBRNA2T00079836001,GSBRNA2T00016167001,GSBRNA2T00054775001,GSBRNA2T00136878001,GSBRNA2T00076869001,GSBRNA2T00156015001,GSBRNA2T00136837001,GSBRNA2T00104909001,GSBRNA2T00009965001,GSBRNA2T00109316001,GSBRNA2T00134389001,GSBRNA2T00081842001,GSBRNA2T00024962001…	1.15963e-05
Biological process	wax biosynthetic process	GO:0010025	6	1.40309e-07	5.79045	14	104	948	40778	GSBRNA2T00092513001,GSBRNA2T00036788001,GSBRNA2T00068788001,GSBRNA2T00038172001,GSBRNA2T00089471001,GSBRNA2T00068790001,GSBRNA2T00066242001,GSBRNA2T00023510001,GSBRNA2T00130760001,GSBRNA2T00065129001,GSBRNA2T00073183001,GSBRNA2T00074279001,GSBRNA2T00132924001,GSBRNA2T00121264001,	1.19518e-05
Biological process	secondary metabolic process	GO:0019748	3	1.97372e-07	1.98769	64	1385	948	40778	GSBRNA2T00078939001,GSBRNA2T00048673001,GSBRNA2T00049770001,GSBRNA2T00005405001,GSBRNA2T00123534001,GSBRNA2T00107313001,GSBRNA2T00068379001,GSBRNA2T00139596001,GSBRNA2T00072065001,GSBRNA2T00033413001,GSBRNA2T00018354001,GSBRNA2T00108888001,GSBRNA2T00143167001,GSBRNA2T00112411001,GSBRNA2T00072713001,GSBRNA2T00020816001,GSBRNA2T00116248001,GSBRNA2T00107166001,GSBRNA2T00093021001,GSBRNA2T00078034001…	1.6318e-05
Biological process	response to light intensity	GO:0009642	6	2.14112e-07	2.70834	34	540	948	40778	GSBRNA2T00056225001,GSBRNA2T00107833001,GSBRNA2T00102714001,GSBRNA2T00139596001,GSBRNA2T00077286001,GSBRNA2T00063249001,GSBRNA2T00093304001,GSBRNA2T00134622001,GSBRNA2T00107195001,GSBRNA2T00100979001,GSBRNA2T00056381001,GSBRNA2T00141706001,GSBRNA2T00129851001,GSBRNA2T00096612001,GSBRNA2T00136837001,GSBRNA2T00103526001,GSBRNA2T00094536001,GSBRNA2T00029762001,GSBRNA2T00016772001,GSBRNA2T00059333001…	1.71962e-05
Biological process	aromatic amino acid family catabolic process	GO:0009074	9	2.47177e-07	6.61766	12	78	948	40778	GSBRNA2T00065785001,GSBRNA2T00073644001,GSBRNA2T00154709001,GSBRNA2T00066145001,GSBRNA2T00041456001,GSBRNA2T00031741001,GSBRNA2T00150971001,GSBRNA2T00058113001,GSBRNA2T00041448001,GSBRNA2T00032032001,GSBRNA2T00122127001,GSBRNA2T00138774001,	1.93004e-05
Biological process	cellular response to hormone stimulus	GO:0032870	6	2.71091e-07	1.62184	113	2997	948	40778	GSBRNA2T00015907001,GSBRNA2T00034313001,GSBRNA2T00011672001,GSBRNA2T00138840001,GSBRNA2T00015003001,GSBRNA2T00046594001,GSBRNA2T00047327001,GSBRNA2T00106945001,GSBRNA2T00107313001,GSBRNA2T00068379001,GSBRNA2T00102026001,GSBRNA2T00139596001,GSBRNA2T00130168001,GSBRNA2T00132612001,GSBRNA2T00099955001,GSBRNA2T00040984001,GSBRNA2T00014233001,GSBRNA2T00046209001,GSBRNA2T00034971001,GSBRNA2T00142002001…	2.00536e-05
Biological process	small molecule catabolic process	GO:0044282	4	2.65015e-07	2.68349	34	545	948	40778	GSBRNA2T00064018001,GSBRNA2T00146276001,GSBRNA2T00134772001,GSBRNA2T00136540001,GSBRNA2T00065785001,GSBRNA2T00011530001,GSBRNA2T00073644001,GSBRNA2T00105598001,GSBRNA2T00154709001,GSBRNA2T00066145001,GSBRNA2T00107195001,GSBRNA2T00041456001,GSBRNA2T00031741001,GSBRNA2T00052478001,GSBRNA2T00004432001,GSBRNA2T00004542001,GSBRNA2T00072383001,GSBRNA2T00009793001,GSBRNA2T00150971001,GSBRNA2T00033460001…	2.01339e-05
Biological process	wax metabolic process	GO:0010166	5	3.19261e-07	5.42529	14	111	948	40778	GSBRNA2T00092513001,GSBRNA2T00036788001,GSBRNA2T00068788001,GSBRNA2T00038172001,GSBRNA2T00089471001,GSBRNA2T00068790001,GSBRNA2T00066242001,GSBRNA2T00023510001,GSBRNA2T00130760001,GSBRNA2T00065129001,GSBRNA2T00073183001,GSBRNA2T00074279001,GSBRNA2T00132924001,GSBRNA2T00121264001,	2.30114e-05
Biological process	response to organonitrogen compound	GO:0010243	5	3.38444e-07	2.06766	56	1165	948	40778	GSBRNA2T00023254001,GSBRNA2T00034313001,GSBRNA2T00048272001,GSBRNA2T00049770001,GSBRNA2T00142798001,GSBRNA2T00154860001,GSBRNA2T00107313001,GSBRNA2T00050955001,GSBRNA2T00136367001,GSBRNA2T00077229001,GSBRNA2T00041679001,GSBRNA2T00052329001,GSBRNA2T00104891001,GSBRNA2T00099375001,GSBRNA2T00105168001,GSBRNA2T00079836001,GSBRNA2T00007141001,GSBRNA2T00050942001,GSBRNA2T00045201001,GSBRNA2T00138277001…	2.37841e-05
Biological process	fatty acid derivative biosynthetic process	GO:1901570	5	6.82003e-07	5.10345	14	118	948	40778	GSBRNA2T00092513001,GSBRNA2T00036788001,GSBRNA2T00068788001,GSBRNA2T00038172001,GSBRNA2T00089471001,GSBRNA2T00068790001,GSBRNA2T00066242001,GSBRNA2T00023510001,GSBRNA2T00130760001,GSBRNA2T00065129001,GSBRNA2T00073183001,GSBRNA2T00074279001,GSBRNA2T00132924001,GSBRNA2T00121264001,	4.67588e-05
Biological process	cell tip growth	GO:0009932	6	9.02374e-07	2.58559	33	549	948	40778	GSBRNA2T00156918001,GSBRNA2T00085697001,GSBRNA2T00081068001,GSBRNA2T00137261001,GSBRNA2T00048662001,GSBRNA2T00150081001,GSBRNA2T00089134001,GSBRNA2T00008436001,GSBRNA2T00136135001,GSBRNA2T00016475001,GSBRNA2T00129640001,GSBRNA2T00128143001,GSBRNA2T00024443001,GSBRNA2T00112105001,GSBRNA2T00074448001,GSBRNA2T00132123001,GSBRNA2T00140403001,GSBRNA2T00054382001,GSBRNA2T00136136001,GSBRNA2T00006359001…	6.03946e-05
Biological process	pigment biosynthetic process	GO:0046148	4	9.8749e-07	2.77824	29	449	948	40778	GSBRNA2T00056225001,GSBRNA2T00078939001,GSBRNA2T00048673001,GSBRNA2T00015003001,GSBRNA2T00046594001,GSBRNA2T00016009001,GSBRNA2T00102026001,GSBRNA2T00143167001,GSBRNA2T00014233001,GSBRNA2T00072713001,GSBRNA2T00025128001,GSBRNA2T00148001001,GSBRNA2T00014739001,GSBRNA2T00066298001,GSBRNA2T00078955001,GSBRNA2T00038144001,GSBRNA2T00117036001,GSBRNA2T00129952001,GSBRNA2T00085884001,GSBRNA2T00107888001…	6.45543e-05
Biological process	anthocyanin-containing compound metabolic process	GO:0046283	5	1.20303e-06	4.06251	17	180	948	40778	GSBRNA2T00048673001,GSBRNA2T00015003001,GSBRNA2T00102026001,GSBRNA2T00143167001,GSBRNA2T00014233001,GSBRNA2T00072713001,GSBRNA2T00066298001,GSBRNA2T00078955001,GSBRNA2T00129952001,GSBRNA2T00107888001,GSBRNA2T00157050001,GSBRNA2T00006630001,GSBRNA2T00102210001,GSBRNA2T00079969001,GSBRNA2T00135361001,GSBRNA2T00063792001,GSBRNA2T00140359001,	7.68571e-05
Biological process	anthocyanin-containing compound biosynthetic process	GO:0009718	6	1.72422e-06	5.55029	12	93	948	40778	GSBRNA2T00048673001,GSBRNA2T00015003001,GSBRNA2T00072713001,GSBRNA2T00078955001,GSBRNA2T00129952001,GSBRNA2T00107888001,GSBRNA2T00157050001,GSBRNA2T00006630001,GSBRNA2T00102210001,GSBRNA2T00079969001,GSBRNA2T00063792001,GSBRNA2T00140359001,	0.000107706
Biological process	flavone biosynthetic process	GO:0051553	6	2.14001e-06	6.72106	10	64	948	40778	GSBRNA2T00078939001,GSBRNA2T00016009001,GSBRNA2T00143167001,GSBRNA2T00148001001,GSBRNA2T00014739001,GSBRNA2T00038144001,GSBRNA2T00117036001,GSBRNA2T00136007001,GSBRNA2T00120313001,GSBRNA2T00135361001,	0.000130773
Biological process	tyrosine catabolic process	GO:0006572	10	2.42104e-06	7.59084	9	51	948	40778	GSBRNA2T00073644001,GSBRNA2T00154709001,GSBRNA2T00066145001,GSBRNA2T00041456001,GSBRNA2T00031741001,GSBRNA2T00041448001,GSBRNA2T00032032001,GSBRNA2T00122127001,GSBRNA2T00138774001,	0.000144799
Biological process	response to temperature stimulus	GO:0009266	4	3.4655e-06	1.67616	83	2130	948	40778	GSBRNA2T00056225001,GSBRNA2T00011672001,GSBRNA2T00004321001,GSBRNA2T00154860001,GSBRNA2T00087850001,GSBRNA2T00106863001,GSBRNA2T00107313001,GSBRNA2T00102714001,GSBRNA2T00053839001,GSBRNA2T00034108001,GSBRNA2T00050955001,GSBRNA2T00008106001,GSBRNA2T00149688001,GSBRNA2T00150502001,GSBRNA2T00077229001,GSBRNA2T00006656001,GSBRNA2T00143020001,GSBRNA2T00110179001,GSBRNA2T00090500001,GSBRNA2T00143917001…	0.000202948
Biological process	hormone-mediated signaling pathway	GO:0009755	6	3.81466e-06	1.59802	97	2611	948	40778	GSBRNA2T00015907001,GSBRNA2T00011672001,GSBRNA2T00015003001,GSBRNA2T00046594001,GSBRNA2T00106945001,GSBRNA2T00107313001,GSBRNA2T00068379001,GSBRNA2T00102026001,GSBRNA2T00139596001,GSBRNA2T00130168001,GSBRNA2T00099955001,GSBRNA2T00040984001,GSBRNA2T00014233001,GSBRNA2T00046209001,GSBRNA2T00034971001,GSBRNA2T00149391001,GSBRNA2T00077229001,GSBRNA2T00085697001,GSBRNA2T00041679001,GSBRNA2T00099637001…	0.000218837
Biological process	response to glucose	GO:0009749	8	4.67676e-06	3.8665	16	178	948	40778	GSBRNA2T00046594001,GSBRNA2T00061592001,GSBRNA2T00143096001,GSBRNA2T00047471001,GSBRNA2T00134741001,GSBRNA2T00060722001,GSBRNA2T00107195001,GSBRNA2T00036935001,GSBRNA2T00055389001,GSBRNA2T00093449001,GSBRNA2T00120569001,GSBRNA2T00056047001,GSBRNA2T00014014001,GSBRNA2T00079211001,GSBRNA2T00046242001,GSBRNA2T00012336001,	0.000257772
Biological process	leucine catabolic process	GO:0006552	10	4.6461e-06	17.9228	5	12	948	40778	GSBRNA2T00064018001,GSBRNA2T00011530001,GSBRNA2T00052478001,GSBRNA2T00004432001,GSBRNA2T00004542001,	0.000261204
Biological process	cellular response to endogenous stimulus	GO:0071495	4	5.03075e-06	1.52147	114	3223	948	40778	GSBRNA2T00015907001,GSBRNA2T00034313001,GSBRNA2T00011672001,GSBRNA2T00048272001,GSBRNA2T00138840001,GSBRNA2T00015003001,GSBRNA2T00046594001,GSBRNA2T00047327001,GSBRNA2T00106945001,GSBRNA2T00107313001,GSBRNA2T00068379001,GSBRNA2T00102026001,GSBRNA2T00139596001,GSBRNA2T00130168001,GSBRNA2T00132612001,GSBRNA2T00099955001,GSBRNA2T00040984001,GSBRNA2T00014233001,GSBRNA2T00046209001,GSBRNA2T00034971001…	0.000271951
Biological process	trehalose biosynthetic process	GO:0005992	8	5.63443e-06	6.05842	10	71	948	40778	GSBRNA2T00153227001,GSBRNA2T00116587001,GSBRNA2T00020794001,GSBRNA2T00100254001,GSBRNA2T00058021001,GSBRNA2T00148002001,GSBRNA2T00097957001,GSBRNA2T00150954001,GSBRNA2T00003564001,GSBRNA2T00000775001,	0.000298838
Biological process	flavonol metabolic process	GO:0051554	6	8.47036e-06	6.56157	9	59	948	40778	GSBRNA2T00078939001,GSBRNA2T00016009001,GSBRNA2T00143167001,GSBRNA2T00148001001,GSBRNA2T00014739001,GSBRNA2T00038144001,GSBRNA2T00117036001,GSBRNA2T00136007001,GSBRNA2T00135361001,	0.00044093
Biological process	flavonol biosynthetic process	GO:0051555	7	8.47036e-06	6.56157	9	59	948	40778	GSBRNA2T00078939001,GSBRNA2T00016009001,GSBRNA2T00143167001,GSBRNA2T00148001001,GSBRNA2T00014739001,GSBRNA2T00038144001,GSBRNA2T00117036001,GSBRNA2T00136007001,GSBRNA2T00135361001,	0.00044093
Biological process	alpha-amino acid metabolic process	GO:1901605	8	1.05669e-05	2.1802	37	730	948	40778	GSBRNA2T00064018001,GSBRNA2T00136396001,GSBRNA2T00063691001,GSBRNA2T00135026001,GSBRNA2T00040984001,GSBRNA2T00065785001,GSBRNA2T00011530001,GSBRNA2T00073644001,GSBRNA2T00024207001,GSBRNA2T00086312001,GSBRNA2T00084801001,GSBRNA2T00154709001,GSBRNA2T00066145001,GSBRNA2T00070646001,GSBRNA2T00134622001,GSBRNA2T00107195001,GSBRNA2T00041456001,GSBRNA2T00002582001,GSBRNA2T00031741001,GSBRNA2T00052478001…	0.000530422
Biological process	response to nitrogen compound	GO:1901698	4	1.1407e-05	1.73957	66	1632	948	40778	GSBRNA2T00023254001,GSBRNA2T00034313001,GSBRNA2T00048272001,GSBRNA2T00049770001,GSBRNA2T00138840001,GSBRNA2T00142798001,GSBRNA2T00154860001,GSBRNA2T00046594001,GSBRNA2T00047327001,GSBRNA2T00107313001,GSBRNA2T00138120001,GSBRNA2T00097267001,GSBRNA2T00050955001,GSBRNA2T00136367001,GSBRNA2T00077229001,GSBRNA2T00041679001,GSBRNA2T00052329001,GSBRNA2T00104891001,GSBRNA2T00099375001,GSBRNA2T00105168001…	0.000562548
Biological process	flavone metabolic process	GO:0051552	5	1.18084e-05	5.58633	10	77	948	40778	GSBRNA2T00078939001,GSBRNA2T00016009001,GSBRNA2T00143167001,GSBRNA2T00148001001,GSBRNA2T00014739001,GSBRNA2T00038144001,GSBRNA2T00117036001,GSBRNA2T00136007001,GSBRNA2T00120313001,GSBRNA2T00135361001,	0.000562601
Biological process	anther dehiscence	GO:0009901	5	1.16686e-05	7.32166	8	47	948	40778	GSBRNA2T00048031001,GSBRNA2T00143096001,GSBRNA2T00147524001,GSBRNA2T00133509001,GSBRNA2T00120941001,GSBRNA2T00093449001,GSBRNA2T00152292001,GSBRNA2T00042422001,	0.000565525
Biological process	cellular response to organic substance	GO:0071310	5	1.28021e-05	1.45045	128	3796	948	40778	GSBRNA2T00015907001,GSBRNA2T00034313001,GSBRNA2T00011672001,GSBRNA2T00048272001,GSBRNA2T00138840001,GSBRNA2T00015003001,GSBRNA2T00046594001,GSBRNA2T00047327001,GSBRNA2T00106945001,GSBRNA2T00107313001,GSBRNA2T00068379001,GSBRNA2T00102026001,GSBRNA2T00139596001,GSBRNA2T00130168001,GSBRNA2T00132612001,GSBRNA2T00138120001,GSBRNA2T00097267001,GSBRNA2T00099955001,GSBRNA2T00040984001,GSBRNA2T00014233001…	0.00059978
Biological process	cellular response to acid chemical	GO:0071229	5	1.34021e-05	1.76617	62	1510	948	40778	GSBRNA2T00034313001,GSBRNA2T00011672001,GSBRNA2T00015003001,GSBRNA2T00046594001,GSBRNA2T00106945001,GSBRNA2T00107313001,GSBRNA2T00068379001,GSBRNA2T00139596001,GSBRNA2T00034108001,GSBRNA2T00099955001,GSBRNA2T00046209001,GSBRNA2T00142002001,GSBRNA2T00132220001,GSBRNA2T00077229001,GSBRNA2T00085697001,GSBRNA2T00041679001,GSBRNA2T00106217001,GSBRNA2T00104891001,GSBRNA2T00079836001,GSBRNA2T00081068001…	0.000607634
Biological process	trehalose metabolic process	GO:0005991	7	1.3265e-05	5.51471	10	78	948	40778	GSBRNA2T00153227001,GSBRNA2T00116587001,GSBRNA2T00020794001,GSBRNA2T00100254001,GSBRNA2T00058021001,GSBRNA2T00148002001,GSBRNA2T00097957001,GSBRNA2T00150954001,GSBRNA2T00003564001,GSBRNA2T00000775001,	0.000611276
Biological process	response to other organism	GO:0051707	5	1.40861e-05	1.44005	131	3913	948	40778	GSBRNA2T00023254001,GSBRNA2T00034313001,GSBRNA2T00112565001,GSBRNA2T00015003001,GSBRNA2T00146276001,GSBRNA2T00143311001,GSBRNA2T00107313001,GSBRNA2T00128203001,GSBRNA2T00139596001,GSBRNA2T00061907001,GSBRNA2T00033413001,GSBRNA2T00027621001,GSBRNA2T00138749001,GSBRNA2T00127041001,GSBRNA2T00086269001,GSBRNA2T00138120001,GSBRNA2T00129716001,GSBRNA2T00097267001,GSBRNA2T00116787001,GSBRNA2T00055848001…	0.000628509
Biological process	response to external biotic stimulus	GO:0043207	4	1.57058e-05	1.43675	131	3922	948	40778	GSBRNA2T00023254001,GSBRNA2T00034313001,GSBRNA2T00112565001,GSBRNA2T00015003001,GSBRNA2T00146276001,GSBRNA2T00143311001,GSBRNA2T00107313001,GSBRNA2T00128203001,GSBRNA2T00139596001,GSBRNA2T00061907001,GSBRNA2T00033413001,GSBRNA2T00027621001,GSBRNA2T00138749001,GSBRNA2T00127041001,GSBRNA2T00086269001,GSBRNA2T00138120001,GSBRNA2T00129716001,GSBRNA2T00097267001,GSBRNA2T00116787001,GSBRNA2T00055848001…	0.00068983
Biological process	pigment metabolic process	GO:0042440	3	1.59764e-05	2.36345	30	546	948	40778	GSBRNA2T00056225001,GSBRNA2T00078939001,GSBRNA2T00048673001,GSBRNA2T00015003001,GSBRNA2T00046594001,GSBRNA2T00016009001,GSBRNA2T00102026001,GSBRNA2T00143167001,GSBRNA2T00014233001,GSBRNA2T00072713001,GSBRNA2T00025128001,GSBRNA2T00148001001,GSBRNA2T00014739001,GSBRNA2T00066298001,GSBRNA2T00078955001,GSBRNA2T00038144001,GSBRNA2T00117036001,GSBRNA2T00129952001,GSBRNA2T00123474001,GSBRNA2T00085884001…	0.000690916
Biological process	tyrosine metabolic process	GO:0006570	9	1.67381e-05	6.04895	9	64	948	40778	GSBRNA2T00073644001,GSBRNA2T00154709001,GSBRNA2T00066145001,GSBRNA2T00041456001,GSBRNA2T00031741001,GSBRNA2T00041448001,GSBRNA2T00032032001,GSBRNA2T00122127001,GSBRNA2T00138774001,	0.000712892
Biological process	response to biotic stimulus	GO:0009607	3	1.81379e-05	1.43237	131	3934	948	40778	GSBRNA2T00023254001,GSBRNA2T00034313001,GSBRNA2T00112565001,GSBRNA2T00015003001,GSBRNA2T00146276001,GSBRNA2T00143311001,GSBRNA2T00107313001,GSBRNA2T00128203001,GSBRNA2T00139596001,GSBRNA2T00061907001,GSBRNA2T00033413001,GSBRNA2T00027621001,GSBRNA2T00138749001,GSBRNA2T00127041001,GSBRNA2T00086269001,GSBRNA2T00138120001,GSBRNA2T00129716001,GSBRNA2T00097267001,GSBRNA2T00116787001,GSBRNA2T00055848001…	0.000749788
Biological process	fatty acid derivative metabolic process	GO:1901568	4	1.79701e-05	3.47594	16	198	948	40778	GSBRNA2T00092513001,GSBRNA2T00036788001,GSBRNA2T00011530001,GSBRNA2T00068788001,GSBRNA2T00038172001,GSBRNA2T00089471001,GSBRNA2T00090867001,GSBRNA2T00068790001,GSBRNA2T00066242001,GSBRNA2T00023510001,GSBRNA2T00130760001,GSBRNA2T00065129001,GSBRNA2T00073183001,GSBRNA2T00074279001,GSBRNA2T00132924001,GSBRNA2T00121264001,	0.00075394
Biological process	response to sucrose	GO:0009744	7	1.98653e-05	2.94622	20	292	948	40778	GSBRNA2T00015907001,GSBRNA2T00015003001,GSBRNA2T00136396001,GSBRNA2T00126659001,GSBRNA2T00129716001,GSBRNA2T00090500001,GSBRNA2T00016028001,GSBRNA2T00107195001,GSBRNA2T00080792001,GSBRNA2T00134569001,GSBRNA2T00028976001,GSBRNA2T00059321001,GSBRNA2T00135993001,GSBRNA2T00056047001,GSBRNA2T00014014001,GSBRNA2T00156205001,GSBRNA2T00125277001,GSBRNA2T00046242001,GSBRNA2T00102210001,GSBRNA2T00133000001,	0.000797733
Biological process	response to oomycetes	GO:0002239	6	2.93682e-05	3.50664	15	184	948	40778	GSBRNA2T00034313001,GSBRNA2T00015003001,GSBRNA2T00104891001,GSBRNA2T00018451001,GSBRNA2T00044009001,GSBRNA2T00150971001,GSBRNA2T00059333001,GSBRNA2T00112088001,GSBRNA2T00154252001,GSBRNA2T00100352001,GSBRNA2T00102210001,GSBRNA2T00120313001,GSBRNA2T00088473001,GSBRNA2T00018128001,GSBRNA2T00009977001,	0.00116273
Biological process	response to disaccharide	GO:0034285	6	3.06182e-05	2.85812	20	301	948	40778	GSBRNA2T00015907001,GSBRNA2T00015003001,GSBRNA2T00136396001,GSBRNA2T00126659001,GSBRNA2T00129716001,GSBRNA2T00090500001,GSBRNA2T00016028001,GSBRNA2T00107195001,GSBRNA2T00080792001,GSBRNA2T00134569001,GSBRNA2T00028976001,GSBRNA2T00059321001,GSBRNA2T00135993001,GSBRNA2T00056047001,GSBRNA2T00014014001,GSBRNA2T00156205001,GSBRNA2T00125277001,GSBRNA2T00046242001,GSBRNA2T00102210001,GSBRNA2T00133000001,	0.00119539
Biological process	response to high light intensity	GO:0009644	7	3.23245e-05	2.76242	21	327	948	40778	GSBRNA2T00056225001,GSBRNA2T00107833001,GSBRNA2T00102714001,GSBRNA2T00139596001,GSBRNA2T00077286001,GSBRNA2T00093304001,GSBRNA2T00100979001,GSBRNA2T00141706001,GSBRNA2T00129851001,GSBRNA2T00136837001,GSBRNA2T00103526001,GSBRNA2T00094536001,GSBRNA2T00029762001,GSBRNA2T00141030001,GSBRNA2T00085884001,GSBRNA2T00016693001,GSBRNA2T00148770001,GSBRNA2T00151270001,GSBRNA2T00021707001,GSBRNA2T00042422001…	0.00124471
Biological process	developmental cell growth	GO:0048588	4	3.4099e-05	2.14129	34	683	948	40778	GSBRNA2T00156918001,GSBRNA2T00085697001,GSBRNA2T00081068001,GSBRNA2T00137261001,GSBRNA2T00048662001,GSBRNA2T00150081001,GSBRNA2T00089134001,GSBRNA2T00008436001,GSBRNA2T00136135001,GSBRNA2T00016475001,GSBRNA2T00129640001,GSBRNA2T00128143001,GSBRNA2T00024443001,GSBRNA2T00112105001,GSBRNA2T00074448001,GSBRNA2T00132123001,GSBRNA2T00140403001,GSBRNA2T00054382001,GSBRNA2T00136136001,GSBRNA2T00006359001…	0.00127803
Biological process	regulation of jasmonic acid mediated signaling pathway	GO:2000022	7	3.69294e-05	3.62775	14	166	948	40778	GSBRNA2T00034971001,GSBRNA2T00099637001,GSBRNA2T00037127001,GSBRNA2T00016167001,GSBRNA2T00136878001,GSBRNA2T00076869001,GSBRNA2T00156015001,GSBRNA2T00134389001,GSBRNA2T00020988001,GSBRNA2T00103000001,GSBRNA2T00108652001,GSBRNA2T00150793001,GSBRNA2T00077012001,GSBRNA2T00154801001,	0.0013659
Biological process	response to inorganic substance	GO:0010035	4	3.80925e-05	1.43866	119	3558	948	40778	GSBRNA2T00011672001,GSBRNA2T00033572001,GSBRNA2T00049770001,GSBRNA2T00138840001,GSBRNA2T00015003001,GSBRNA2T00158101001,GSBRNA2T00154860001,GSBRNA2T00046594001,GSBRNA2T00047327001,GSBRNA2T00102714001,GSBRNA2T00066740001,GSBRNA2T00102026001,GSBRNA2T00139596001,GSBRNA2T00053839001,GSBRNA2T00027621001,GSBRNA2T00034108001,GSBRNA2T00127041001,GSBRNA2T00050955001,GSBRNA2T00055848001,GSBRNA2T00150940001…	0.00139062
Biological process	regulation of pollen tube growth	GO:0080092	8	4.0089e-05	4.09664	12	126	948	40778	GSBRNA2T00085697001,GSBRNA2T00081068001,GSBRNA2T00048662001,GSBRNA2T00089134001,GSBRNA2T00024443001,GSBRNA2T00074448001,GSBRNA2T00132123001,GSBRNA2T00054382001,GSBRNA2T00006359001,GSBRNA2T00083653001,GSBRNA2T00073954001,GSBRNA2T00038856001,	0.00144475
Biological process	response to auxin	GO:0009733	6	4.3705e-05	1.80705	51	1214	948	40778	GSBRNA2T00015003001,GSBRNA2T00154860001,GSBRNA2T00108884001,GSBRNA2T00016009001,GSBRNA2T00139596001,GSBRNA2T00130168001,GSBRNA2T00132612001,GSBRNA2T00040984001,GSBRNA2T00149391001,GSBRNA2T00035196001,GSBRNA2T00069346001,GSBRNA2T00150502001,GSBRNA2T00107166001,GSBRNA2T00039890001,GSBRNA2T00077338001,GSBRNA2T00136074001,GSBRNA2T00148001001,GSBRNA2T00121591001,GSBRNA2T00014739001,GSBRNA2T00060722001…	0.00155512
Biological process	interspecies interaction between organisms	GO:0044419	2	4.68872e-05	1.39877	133	4090	948	40778	GSBRNA2T00023254001,GSBRNA2T00034313001,GSBRNA2T00112565001,GSBRNA2T00015003001,GSBRNA2T00146276001,GSBRNA2T00143311001,GSBRNA2T00107313001,GSBRNA2T00128203001,GSBRNA2T00139596001,GSBRNA2T00061907001,GSBRNA2T00033413001,GSBRNA2T00027621001,GSBRNA2T00138749001,GSBRNA2T00127041001,GSBRNA2T00086269001,GSBRNA2T00138120001,GSBRNA2T00129716001,GSBRNA2T00097267001,GSBRNA2T00116787001,GSBRNA2T00055848001…	0.0016475
Biological process	phenylpropanoid metabolic process	GO:0009698	5	5.31319e-05	2.37449	26	471	948	40778	GSBRNA2T00078939001,GSBRNA2T00048673001,GSBRNA2T00108888001,GSBRNA2T00072713001,GSBRNA2T00116248001,GSBRNA2T00105135001,GSBRNA2T00143309001,GSBRNA2T00089471001,GSBRNA2T00131017001,GSBRNA2T00124437001,GSBRNA2T00052592001,GSBRNA2T00121465001,GSBRNA2T00059333001,GSBRNA2T00043434001,GSBRNA2T00069344001,GSBRNA2T00067539001,GSBRNA2T00130760001,GSBRNA2T00047517001,GSBRNA2T00154252001,GSBRNA2T00107888001…	0.00184387
Biological process	disaccharide biosynthetic process	GO:0046351	7	5.67657e-05	4.67552	10	92	948	40778	GSBRNA2T00153227001,GSBRNA2T00116587001,GSBRNA2T00020794001,GSBRNA2T00100254001,GSBRNA2T00058021001,GSBRNA2T00148002001,GSBRNA2T00097957001,GSBRNA2T00150954001,GSBRNA2T00003564001,GSBRNA2T00000775001,	0.00194596
Biological process	unidimensional cell growth	GO:0009826	5	5.79018e-05	1.8666	45	1037	948	40778	GSBRNA2T00156918001,GSBRNA2T00040984001,GSBRNA2T00085697001,GSBRNA2T00081068001,GSBRNA2T00077338001,GSBRNA2T00121591001,GSBRNA2T00137261001,GSBRNA2T00048662001,GSBRNA2T00150081001,GSBRNA2T00089134001,GSBRNA2T00068307001,GSBRNA2T00008436001,GSBRNA2T00136135001,GSBRNA2T00012398001,GSBRNA2T00016475001,GSBRNA2T00129640001,GSBRNA2T00128143001,GSBRNA2T00024443001,GSBRNA2T00048180001,GSBRNA2T00155291001…	0.00196099
Biological process	cellular response to oxygen-containing compound	GO:1901701	5	6.73802e-05	1.49589	94	2703	948	40778	GSBRNA2T00034313001,GSBRNA2T00011672001,GSBRNA2T00138840001,GSBRNA2T00015003001,GSBRNA2T00046594001,GSBRNA2T00047327001,GSBRNA2T00106945001,GSBRNA2T00107313001,GSBRNA2T00068379001,GSBRNA2T00139596001,GSBRNA2T00034108001,GSBRNA2T00099955001,GSBRNA2T00046209001,GSBRNA2T00034971001,GSBRNA2T00142002001,GSBRNA2T00143096001,GSBRNA2T00132220001,GSBRNA2T00077229001,GSBRNA2T00085697001,GSBRNA2T00041679001…	0.00225483
Biological process	regulation of response to water deprivation	GO:2000070	6	6.99654e-05	3.42163	14	176	948	40778	GSBRNA2T00049770001,GSBRNA2T00066740001,GSBRNA2T00139596001,GSBRNA2T00070155001,GSBRNA2T00104568001,GSBRNA2T00065032001,GSBRNA2T00065750001,GSBRNA2T00066571001,GSBRNA2T00136837001,GSBRNA2T00078837001,GSBRNA2T00067739001,GSBRNA2T00066570001,GSBRNA2T00006243001,GSBRNA2T00156098001,	0.0023138
Biological process	oxidation-reduction process	GO:0055114	3	7.65538e-05	1.43598	111	3325	948	40778	GSBRNA2T00015907001,GSBRNA2T00048673001,GSBRNA2T00113662001,GSBRNA2T00136396001,GSBRNA2T00148277001,GSBRNA2T00093908001,GSBRNA2T00087850001,GSBRNA2T00134772001,GSBRNA2T00016009001,GSBRNA2T00082310001,GSBRNA2T00053839001,GSBRNA2T00063814001,GSBRNA2T00033413001,GSBRNA2T00018354001,GSBRNA2T00055407001,GSBRNA2T00090868001,GSBRNA2T00115928001,GSBRNA2T00011530001,GSBRNA2T00073644001,GSBRNA2T00068788001…	0.00250224
Biological process	pollen development	GO:0009555	6	0.000117389	1.77076	48	1166	948	40778	GSBRNA2T00005405001,GSBRNA2T00083812001,GSBRNA2T00107313001,GSBRNA2T00053336001,GSBRNA2T00001337001,GSBRNA2T00108888001,GSBRNA2T00046209001,GSBRNA2T00077229001,GSBRNA2T00105135001,GSBRNA2T00102029001,GSBRNA2T00016167001,GSBRNA2T00154474001,GSBRNA2T00070155001,GSBRNA2T00155831001,GSBRNA2T00037026001,GSBRNA2T00124437001,GSBRNA2T00121984001,GSBRNA2T00136878001,GSBRNA2T00062229001,GSBRNA2T00120941001…	0.00379289
Biological process	response to ethylene	GO:0009723	6	0.000123271	1.9185	38	852	948	40778	GSBRNA2T00034313001,GSBRNA2T00138840001,GSBRNA2T00015003001,GSBRNA2T00154860001,GSBRNA2T00047327001,GSBRNA2T00139596001,GSBRNA2T00035196001,GSBRNA2T00150502001,GSBRNA2T00041679001,GSBRNA2T00104891001,GSBRNA2T00079836001,GSBRNA2T00024662001,GSBRNA2T00045201001,GSBRNA2T00121591001,GSBRNA2T00054775001,GSBRNA2T00060722001,GSBRNA2T00038144001,GSBRNA2T00076869001,GSBRNA2T00030721001,GSBRNA2T00018305001…	0.00393766
Biological process	regulation of flavonoid biosynthetic process	GO:0009962	6	0.000136279	3.87838	11	122	948	40778	GSBRNA2T00015003001,GSBRNA2T00143167001,GSBRNA2T00077286001,GSBRNA2T00143309001,GSBRNA2T00141706001,GSBRNA2T00038144001,GSBRNA2T00129952001,GSBRNA2T00107888001,GSBRNA2T00102210001,GSBRNA2T00135361001,GSBRNA2T00140359001,	0.00425645
Biological process	trehalose metabolism in response to stress	GO:0070413	8	0.000141739	7.37396	6	35	948	40778	GSBRNA2T00153227001,GSBRNA2T00116587001,GSBRNA2T00020794001,GSBRNA2T00058021001,GSBRNA2T00148002001,GSBRNA2T00003564001,	0.00437832
Biological process	response to heat	GO:0009408	5	0.000162606	1.93084	36	802	948	40778	GSBRNA2T00056225001,GSBRNA2T00102714001,GSBRNA2T00008106001,GSBRNA2T00149688001,GSBRNA2T00143020001,GSBRNA2T00110179001,GSBRNA2T00090500001,GSBRNA2T00143917001,GSBRNA2T00093304001,GSBRNA2T00104568001,GSBRNA2T00103058001,GSBRNA2T00100979001,GSBRNA2T00018261001,GSBRNA2T00144045001,GSBRNA2T00129851001,GSBRNA2T00078837001,GSBRNA2T00156503001,GSBRNA2T00103526001,GSBRNA2T00028976001,GSBRNA2T00029762001…	0.00496831
Biological process	dehiscence	GO:0009900	4	0.000177452	4.50155	9	86	948	40778	GSBRNA2T00048031001,GSBRNA2T00143096001,GSBRNA2T00147524001,GSBRNA2T00133509001,GSBRNA2T00120941001,GSBRNA2T00033278001,GSBRNA2T00093449001,GSBRNA2T00152292001,GSBRNA2T00042422001,	0.00536364
Biological process	oligosaccharide biosynthetic process	GO:0009312	6	0.000194566	3.72569	11	127	948	40778	GSBRNA2T00153227001,GSBRNA2T00116587001,GSBRNA2T00020794001,GSBRNA2T00100254001,GSBRNA2T00058021001,GSBRNA2T00148002001,GSBRNA2T00097957001,GSBRNA2T00150954001,GSBRNA2T00090939001,GSBRNA2T00003564001,GSBRNA2T00000775001,	0.00581835
Biological process	branched-chain amino acid catabolic process	GO:0009083	9	0.000197733	8.96141	5	24	948	40778	GSBRNA2T00064018001,GSBRNA2T00011530001,GSBRNA2T00052478001,GSBRNA2T00004432001,GSBRNA2T00004542001,	0.00585081
Biological process	response to external stimulus	GO:0009605	3	0.000204399	1.3042	164	5409	948	40778	GSBRNA2T00023254001,GSBRNA2T00034313001,GSBRNA2T00048272001,GSBRNA2T00112565001,GSBRNA2T00015003001,GSBRNA2T00146276001,GSBRNA2T00110474001,GSBRNA2T00143311001,GSBRNA2T00061592001,GSBRNA2T00107313001,GSBRNA2T00128203001,GSBRNA2T00139596001,GSBRNA2T00061907001,GSBRNA2T00033413001,GSBRNA2T00027621001,GSBRNA2T00034108001,GSBRNA2T00138749001,GSBRNA2T00127041001,GSBRNA2T00086269001,GSBRNA2T00138120001…	0.00598505
Biological process	response to antibiotic	GO:0046677	4	0.0002173	1.73536	47	1165	948	40778	GSBRNA2T00023254001,GSBRNA2T00102714001,GSBRNA2T00139596001,GSBRNA2T00027621001,GSBRNA2T00129716001,GSBRNA2T00116787001,GSBRNA2T00142002001,GSBRNA2T00132220001,GSBRNA2T00035196001,GSBRNA2T00150502001,GSBRNA2T00043731001,GSBRNA2T00090500001,GSBRNA2T00093304001,GSBRNA2T00016028001,GSBRNA2T00132030001,GSBRNA2T00056381001,GSBRNA2T00132221001,GSBRNA2T00096312001,GSBRNA2T00080792001,GSBRNA2T00076869001…	0.00629723
Biological process	cell morphogenesis involved in differentiation	GO:0000904	5	0.000234016	1.80883	41	975	948	40778	GSBRNA2T00060160001,GSBRNA2T00156918001,GSBRNA2T00068379001,GSBRNA2T00085697001,GSBRNA2T00081068001,GSBRNA2T00137261001,GSBRNA2T00048662001,GSBRNA2T00150081001,GSBRNA2T00089134001,GSBRNA2T00008436001,GSBRNA2T00047951001,GSBRNA2T00136135001,GSBRNA2T00079776001,GSBRNA2T00016475001,GSBRNA2T00129640001,GSBRNA2T00128143001,GSBRNA2T00024443001,GSBRNA2T00155291001,GSBRNA2T00022614001,GSBRNA2T00112105001…	0.00671245
Biological process	leucine metabolic process	GO:0006551	9	0.000242453	8.60295	5	25	948	40778	GSBRNA2T00064018001,GSBRNA2T00011530001,GSBRNA2T00052478001,GSBRNA2T00004432001,GSBRNA2T00004542001,	0.00681536
Biological process	auxin efflux	GO:0010315	8	0.00026653	4.77942	8	72	948	40778	GSBRNA2T00040984001,GSBRNA2T00148001001,GSBRNA2T00014739001,GSBRNA2T00060722001,GSBRNA2T00012398001,GSBRNA2T00026547001,GSBRNA2T00140563001,GSBRNA2T00147858001,	0.00741799
Biological process	aromatic amino acid family metabolic process	GO:0009072	8	0.000281139	2.75295	16	250	948	40778	GSBRNA2T00040984001,GSBRNA2T00065785001,GSBRNA2T00073644001,GSBRNA2T00024207001,GSBRNA2T00086312001,GSBRNA2T00154709001,GSBRNA2T00066145001,GSBRNA2T00041456001,GSBRNA2T00031741001,GSBRNA2T00012398001,GSBRNA2T00150971001,GSBRNA2T00058113001,GSBRNA2T00041448001,GSBRNA2T00032032001,GSBRNA2T00122127001,GSBRNA2T00138774001,	0.00774786
Biological process	response to growth hormone	GO:0060416	8	0.00029446	8.27207	5	26	948	40778	GSBRNA2T00049770001,GSBRNA2T00065032001,GSBRNA2T00066571001,GSBRNA2T00066570001,GSBRNA2T00156098001,	0.00795891
Biological process	glutathione metabolic process	GO:0006749	7	0.000297316	2.98122	14	202	948	40778	GSBRNA2T00049770001,GSBRNA2T00055407001,GSBRNA2T00143167001,GSBRNA2T00065032001,GSBRNA2T00120591001,GSBRNA2T00145946001,GSBRNA2T00066571001,GSBRNA2T00130425001,GSBRNA2T00057463001,GSBRNA2T00066570001,GSBRNA2T00156098001,GSBRNA2T00135361001,GSBRNA2T00150415001,GSBRNA2T00009527001,	0.00795959
Biological process	cell growth	GO:0016049	3	0.000292	1.6032	59	1583	948	40778	GSBRNA2T00156918001,GSBRNA2T00132612001,GSBRNA2T00040984001,GSBRNA2T00085697001,GSBRNA2T00045158001,GSBRNA2T00043731001,GSBRNA2T00081068001,GSBRNA2T00077338001,GSBRNA2T00121591001,GSBRNA2T00137261001,GSBRNA2T00086261001,GSBRNA2T00126835001,GSBRNA2T00048662001,GSBRNA2T00134597001,GSBRNA2T00018261001,GSBRNA2T00150081001,GSBRNA2T00089134001,GSBRNA2T00068307001,GSBRNA2T00008436001,GSBRNA2T00136135001…	0.00796906
Biological process	indole glucosinolate metabolic process	GO:0042343	9	0.000322236	4.65025	8	74	948	40778	GSBRNA2T00139596001,GSBRNA2T00033413001,GSBRNA2T00020816001,GSBRNA2T00102801001,GSBRNA2T00136837001,GSBRNA2T00121572001,GSBRNA2T00131134001,GSBRNA2T00119156001,	0.00846548
Biological process	response to UV-B	GO:0010224	7	0.000321054	2.7203	16	253	948	40778	GSBRNA2T00137481001,GSBRNA2T00108884001,GSBRNA2T00107313001,GSBRNA2T00079516001,GSBRNA2T00153841001,GSBRNA2T00069346001,GSBRNA2T00131017001,GSBRNA2T00038144001,GSBRNA2T00143966001,GSBRNA2T00117036001,GSBRNA2T00129952001,GSBRNA2T00123474001,GSBRNA2T00121465001,GSBRNA2T00011253001,GSBRNA2T00156205001,GSBRNA2T00140359001,	0.008514
Biological process	response to hexose	GO:0009746	7	0.000350303	2.69897	16	255	948	40778	GSBRNA2T00046594001,GSBRNA2T00061592001,GSBRNA2T00143096001,GSBRNA2T00047471001,GSBRNA2T00134741001,GSBRNA2T00060722001,GSBRNA2T00107195001,GSBRNA2T00036935001,GSBRNA2T00055389001,GSBRNA2T00093449001,GSBRNA2T00120569001,GSBRNA2T00056047001,GSBRNA2T00014014001,GSBRNA2T00079211001,GSBRNA2T00046242001,GSBRNA2T00012336001,	0.0091176
Biological process	cellular response to chemical stimulus	GO:0070887	4	0.000370815	1.31077	147	4824	948	40778	GSBRNA2T00015907001,GSBRNA2T00034313001,GSBRNA2T00011672001,GSBRNA2T00048272001,GSBRNA2T00113662001,GSBRNA2T00138840001,GSBRNA2T00015003001,GSBRNA2T00046594001,GSBRNA2T00047327001,GSBRNA2T00106945001,GSBRNA2T00107313001,GSBRNA2T00068379001,GSBRNA2T00102026001,GSBRNA2T00139596001,GSBRNA2T00053839001,GSBRNA2T00033413001,GSBRNA2T00034108001,GSBRNA2T00130168001,GSBRNA2T00132612001,GSBRNA2T00138120001…	0.00956295
Cellular component	external encapsulating structure	GO:0030312	3	7.30205e-10	1.98305	89	2143	837	39966	GSBRNA2T00034313001,GSBRNA2T00093269001,GSBRNA2T00004321001,GSBRNA2T00145925001,GSBRNA2T00028840001,GSBRNA2T00093908001,GSBRNA2T00053839001,GSBRNA2T00071995001,GSBRNA2T00108120001,GSBRNA2T00076881001,GSBRNA2T00100254001,GSBRNA2T00011949001,GSBRNA2T00156935001,GSBRNA2T00104891001,GSBRNA2T00049176001,GSBRNA2T00006656001,GSBRNA2T00043731001,GSBRNA2T00156586001,GSBRNA2T00143088001,GSBRNA2T00071362001…	1.42025e-07
Cellular component	extracellular region	GO:0005576	3	1.42988e-09	2.03455	81	1901	837	39966	GSBRNA2T00034313001,GSBRNA2T00004321001,GSBRNA2T00136396001,GSBRNA2T00020479001,GSBRNA2T00063691001,GSBRNA2T00087850001,GSBRNA2T00135026001,GSBRNA2T00076443001,GSBRNA2T00018412001,GSBRNA2T00120775001,GSBRNA2T00100254001,GSBRNA2T00048940001,GSBRNA2T00104891001,GSBRNA2T00017965001,GSBRNA2T00049176001,GSBRNA2T00001177001,GSBRNA2T00143088001,GSBRNA2T00071362001,GSBRNA2T00090500001,GSBRNA2T00011180001…	1.85407e-07
Cellular component	cell wall	GO:0005618	4	6.81751e-10	1.98583	89	2140	837	39966	GSBRNA2T00034313001,GSBRNA2T00093269001,GSBRNA2T00004321001,GSBRNA2T00145925001,GSBRNA2T00028840001,GSBRNA2T00093908001,GSBRNA2T00053839001,GSBRNA2T00071995001,GSBRNA2T00108120001,GSBRNA2T00076881001,GSBRNA2T00100254001,GSBRNA2T00011949001,GSBRNA2T00156935001,GSBRNA2T00104891001,GSBRNA2T00049176001,GSBRNA2T00006656001,GSBRNA2T00043731001,GSBRNA2T00156586001,GSBRNA2T00143088001,GSBRNA2T00071362001…	2.65201e-07
Cellular component	apoplast	GO:0048046	4	2.97539e-06	2.04822	48	1119	837	39966	GSBRNA2T00034313001,GSBRNA2T00004321001,GSBRNA2T00136396001,GSBRNA2T00063691001,GSBRNA2T00087850001,GSBRNA2T00135026001,GSBRNA2T00076443001,GSBRNA2T00120775001,GSBRNA2T00104891001,GSBRNA2T00017965001,GSBRNA2T00049176001,GSBRNA2T00143088001,GSBRNA2T00071362001,GSBRNA2T00090500001,GSBRNA2T00137261001,GSBRNA2T00043475001,GSBRNA2T00131100001,GSBRNA2T00071647001,GSBRNA2T00065522001,GSBRNA2T00047951001…	0.000289357
Cellular component	cell periphery	GO:0071944	3	9.66204e-06	1.24759	282	10793	837	39966	GSBRNA2T00015907001,GSBRNA2T00034313001,GSBRNA2T00078939001,GSBRNA2T00093269001,GSBRNA2T00004321001,GSBRNA2T00145925001,GSBRNA2T00107833001,GSBRNA2T00138909001,GSBRNA2T00028840001,GSBRNA2T00093908001,GSBRNA2T00136602001,GSBRNA2T00091810001,GSBRNA2T00063691001,GSBRNA2T00083812001,GSBRNA2T00042303001,GSBRNA2T00092513001,GSBRNA2T00021941001,GSBRNA2T00005576001,GSBRNA2T00135026001,GSBRNA2T00041443001…	0.000751707
Cellular component	pollen tube	GO:0090406	5	8.70562e-05	3.35923	14	199	837	39966	GSBRNA2T00138909001,GSBRNA2T00153670001,GSBRNA2T00089134001,GSBRNA2T00136135001,GSBRNA2T00016475001,GSBRNA2T00129640001,GSBRNA2T00112015001,GSBRNA2T00128143001,GSBRNA2T00057504001,GSBRNA2T00132123001,GSBRNA2T00136136001,GSBRNA2T00134487001,GSBRNA2T00094938001,GSBRNA2T00038856001,	0.00564415
Cellular component	plant-type cell wall	GO:0009505	5	0.000110842	1.92823	38	941	837	39966	GSBRNA2T00034313001,GSBRNA2T00004321001,GSBRNA2T00053839001,GSBRNA2T00156935001,GSBRNA2T00104891001,GSBRNA2T00006656001,GSBRNA2T00043731001,GSBRNA2T00143088001,GSBRNA2T00071362001,GSBRNA2T00039890001,GSBRNA2T00105135001,GSBRNA2T00134456001,GSBRNA2T00043475001,GSBRNA2T00071647001,GSBRNA2T00136160001,GSBRNA2T00065522001,GSBRNA2T00013585001,GSBRNA2T00136135001,GSBRNA2T00016475001,GSBRNA2T00129640001…	0.00615964
Molecular function	oxidoreductase activity	GO:0016491	3	1.05382e-05	1.54568	99	2723	827	35159	GSBRNA2T00048673001,GSBRNA2T00113662001,GSBRNA2T00136396001,GSBRNA2T00148277001,GSBRNA2T00093908001,GSBRNA2T00087850001,GSBRNA2T00134772001,GSBRNA2T00016009001,GSBRNA2T00082310001,GSBRNA2T00053839001,GSBRNA2T00063814001,GSBRNA2T00033413001,GSBRNA2T00018354001,GSBRNA2T00055407001,GSBRNA2T00115928001,GSBRNA2T00011530001,GSBRNA2T00073644001,GSBRNA2T00068788001,GSBRNA2T00072713001,GSBRNA2T00020816001…	0.000816231
Molecular function	transcription regulator activity	GO:0140110	3	6.2869e-06	1.3727	173	5358	827	35159	GSBRNA2T00033572001,GSBRNA2T00138840001,GSBRNA2T00015003001,GSBRNA2T00137481001,GSBRNA2T00158101001,GSBRNA2T00154860001,GSBRNA2T00123534001,GSBRNA2T00046594001,GSBRNA2T00100639001,GSBRNA2T00068678001,GSBRNA2T00106863001,GSBRNA2T00047327001,GSBRNA2T00145155001,GSBRNA2T00126659001,GSBRNA2T00068379001,GSBRNA2T00102026001,GSBRNA2T00139596001,GSBRNA2T00153841001,GSBRNA2T00130168001,GSBRNA2T00127041001…	0.00089274
Molecular function	monooxygenase activity	GO:0004497	4	7.36434e-06	2.45745	30	519	827	35159	GSBRNA2T00148277001,GSBRNA2T00033413001,GSBRNA2T00018354001,GSBRNA2T00068788001,GSBRNA2T00020816001,GSBRNA2T00107166001,GSBRNA2T00078034001,GSBRNA2T00105135001,GSBRNA2T00136074001,GSBRNA2T00131017001,GSBRNA2T00118673001,GSBRNA2T00035401001,GSBRNA2T00070646001,GSBRNA2T00044009001,GSBRNA2T00068790001,GSBRNA2T00089173001,GSBRNA2T00037314001,GSBRNA2T00150971001,GSBRNA2T00121465001,GSBRNA2T00043434001…	0.000896346
Molecular function	polygalacturonase activity	GO:0004650	6	5.26745e-06	8.09789	8	42	827	35159	GSBRNA2T00059182001,GSBRNA2T00150685001,GSBRNA2T00016719001,GSBRNA2T00059181001,GSBRNA2T00048242001,GSBRNA2T00085465001,GSBRNA2T00089606001,GSBRNA2T00150427001,	0.000897573
Molecular function	DNA-binding transcription factor activity	GO:0003700	4	1.40782e-05	1.37169	162	5021	827	35159	GSBRNA2T00033572001,GSBRNA2T00138840001,GSBRNA2T00015003001,GSBRNA2T00137481001,GSBRNA2T00158101001,GSBRNA2T00154860001,GSBRNA2T00123534001,GSBRNA2T00046594001,GSBRNA2T00100639001,GSBRNA2T00068678001,GSBRNA2T00106863001,GSBRNA2T00047327001,GSBRNA2T00145155001,GSBRNA2T00126659001,GSBRNA2T00068379001,GSBRNA2T00102026001,GSBRNA2T00139596001,GSBRNA2T00153841001,GSBRNA2T00130168001,GSBRNA2T00127041001…	0.000999551
Molecular function	protein histidine kinase binding	GO:0043424	7	3.62857e-06	6.34536	10	67	827	35159	GSBRNA2T00042303001,GSBRNA2T00129716001,GSBRNA2T00016028001,GSBRNA2T00017801001,GSBRNA2T00080792001,GSBRNA2T00059913001,GSBRNA2T00134569001,GSBRNA2T00112088001,GSBRNA2T00135993001,GSBRNA2T00056988001,	0.00103051
Molecular function	xylan 1,4-beta-xylosidase activity	GO:0009044	7	9.73165e-06	9.0181	7	33	827	35159	GSBRNA2T00128737001,GSBRNA2T00065522001,GSBRNA2T00076979001,GSBRNA2T00063439001,GSBRNA2T00086247001,GSBRNA2T00081032001,GSBRNA2T00054757001,	0.00103642
Molecular function	allene-oxide cyclase activity	GO:0046423	5	4.91145e-06	17.7141	5	12	827	35159	GSBRNA2T00117873001,GSBRNA2T00027807001,GSBRNA2T00027803001,GSBRNA2T00077985001,GSBRNA2T00139182001,	0.00104614
Molecular function	pectinesterase activity	GO:0030599	6	1.72393e-05	3.66499	15	174	827	35159	GSBRNA2T00138909001,GSBRNA2T00066162001,GSBRNA2T00055435001,GSBRNA2T00136135001,GSBRNA2T00134589001,GSBRNA2T00071611001,GSBRNA2T00016475001,GSBRNA2T00129640001,GSBRNA2T00057504001,GSBRNA2T00138784001,GSBRNA2T00106906001,GSBRNA2T00111896001,GSBRNA2T00136136001,GSBRNA2T00134487001,GSBRNA2T00022521001,	0.00112984
Molecular function	chalcone isomerase activity	GO:0045430	5	2.92176e-06	19.3245	5	11	827	35159	GSBRNA2T00108884001,GSBRNA2T00069346001,GSBRNA2T00106930001,GSBRNA2T00136280001,GSBRNA2T00011253001,	0.00124467
Molecular function	molecular function regulator	GO:0098772	2	1.64385e-06	1.34832	209	6590	827	35159	GSBRNA2T00033572001,GSBRNA2T00138840001,GSBRNA2T00015003001,GSBRNA2T00137481001,GSBRNA2T00158101001,GSBRNA2T00154860001,GSBRNA2T00138909001,GSBRNA2T00123534001,GSBRNA2T00046594001,GSBRNA2T00100639001,GSBRNA2T00068678001,GSBRNA2T00083812001,GSBRNA2T00106863001,GSBRNA2T00047327001,GSBRNA2T00106945001,GSBRNA2T00145155001,GSBRNA2T00126659001,GSBRNA2T00068379001,GSBRNA2T00102026001,GSBRNA2T00139596001…	0.00140056
Molecular function	oxidoreductase activity, acting on paired donors, with incorporation or reduction of molecular oxygen	GO:0016705	4	3.07471e-05	2.17851	33	644	827	35159	GSBRNA2T00048673001,GSBRNA2T00148277001,GSBRNA2T00016009001,GSBRNA2T00033413001,GSBRNA2T00018354001,GSBRNA2T00068788001,GSBRNA2T00072713001,GSBRNA2T00020816001,GSBRNA2T00105598001,GSBRNA2T00107166001,GSBRNA2T00078034001,GSBRNA2T00105135001,GSBRNA2T00129251001,GSBRNA2T00136074001,GSBRNA2T00131017001,GSBRNA2T00118673001,GSBRNA2T00070646001,GSBRNA2T00068790001,GSBRNA2T00037314001,GSBRNA2T00150971001…	0.00187118
Molecular function	oxidoreductase activity, acting on diphenols and related substances as donors, oxygen as acceptor	GO:0016682	5	6.09489e-05	8.50278	6	30	827	35159	GSBRNA2T00063814001,GSBRNA2T00006586001,GSBRNA2T00079987001,GSBRNA2T00154805001,GSBRNA2T00015791001,GSBRNA2T00066304001,	0.00324553
Molecular function	xylanase activity	GO:0097599	6	6.97374e-05	6.76358	7	44	827	35159	GSBRNA2T00128737001,GSBRNA2T00065522001,GSBRNA2T00076979001,GSBRNA2T00063439001,GSBRNA2T00086247001,GSBRNA2T00081032001,GSBRNA2T00054757001,	0.00349507
Molecular function	hydrolase activity, hydrolyzing O-glycosyl compounds	GO:0004553	5	0.000118674	2.00482	34	721	827	35159	GSBRNA2T00017007001,GSBRNA2T00143088001,GSBRNA2T00059182001,GSBRNA2T00121376001,GSBRNA2T00128737001,GSBRNA2T00110703001,GSBRNA2T00065522001,GSBRNA2T00128197001,GSBRNA2T00076979001,GSBRNA2T00150685001,GSBRNA2T00130886001,GSBRNA2T00023872001,GSBRNA2T00128201001,GSBRNA2T00069089001,GSBRNA2T00100044001,GSBRNA2T00134749001,GSBRNA2T00016719001,GSBRNA2T00063439001,GSBRNA2T00086247001,GSBRNA2T00059181001…	0.00561725
Molecular function	intramolecular lyase activity	GO:0016872	4	0.000134305	9.66225	5	22	827	35159	GSBRNA2T00108884001,GSBRNA2T00069346001,GSBRNA2T00106930001,GSBRNA2T00136280001,GSBRNA2T00011253001,	0.0057214
Molecular function	oxidoreductase activity, acting on the CH-NH group of donors, oxygen as acceptor	GO:0016647	5	0.0001683	9.24215	5	23	827	35159	GSBRNA2T00082310001,GSBRNA2T00044812001,GSBRNA2T00013759001,GSBRNA2T00090976001,GSBRNA2T00012266001,	0.00682818
Molecular function	nickel cation binding	GO:0016151	7	0.0001683	9.24215	5	23	827	35159	GSBRNA2T00050955001,GSBRNA2T00050633001,GSBRNA2T00134984001,GSBRNA2T00028976001,GSBRNA2T00133000001,	0.00682818
Molecular function	oxidoreductase activity, acting on paired donors, with incorporation or reduction of molecular oxygen, reduced iron-sulfur protein as one donor, and incorporation of one atom of oxygen	GO:0016713	5	0.000208489	8.85706	5	24	827	35159	GSBRNA2T00148277001,GSBRNA2T00068788001,GSBRNA2T00118673001,GSBRNA2T00068790001,GSBRNA2T00023510001,	0.00772317
Molecular function	hydrolase activity, acting on glycosyl bonds	GO:0016798	4	0.000237466	1.91012	35	779	827	35159	GSBRNA2T00017007001,GSBRNA2T00143088001,GSBRNA2T00059182001,GSBRNA2T00121376001,GSBRNA2T00128737001,GSBRNA2T00110703001,GSBRNA2T00065522001,GSBRNA2T00128197001,GSBRNA2T00076979001,GSBRNA2T00150685001,GSBRNA2T00130886001,GSBRNA2T00023872001,GSBRNA2T00153973001,GSBRNA2T00128201001,GSBRNA2T00069089001,GSBRNA2T00100044001,GSBRNA2T00134749001,GSBRNA2T00016719001,GSBRNA2T00063439001,GSBRNA2T00086247001…	0.00843004

## Sheet: 6-8 stage_DEGs_GO
Class	GO_Name	GO_ID	GO_Level	P_value	EnrichmentScore	HitsGenesCountsInSelectedSet	HitsGenesCountsInBackground	AllGenesCountsInSelectedSet	AllGenesCountsInBackground	GenesOfSelectedSetInGOterm	corrected p-value(BH method)
Biological process	response to jasmonic acid	GO:0009753	6	1.31792e-11	3.95587	34	1040	337	40778	GSBRNA2T00132937001,GSBRNA2T00048673001,GSBRNA2T00104909001,GSBRNA2T00016167001,GSBRNA2T00119748001,GSBRNA2T00018441001,GSBRNA2T00129952001,GSBRNA2T00134235001,GSBRNA2T00134120001,GSBRNA2T00097858001,GSBRNA2T00121592001,GSBRNA2T00036842001,GSBRNA2T00136878001,GSBRNA2T00134389001,GSBRNA2T00138749001,GSBRNA2T00135993001,GSBRNA2T00150793001,GSBRNA2T00154851001,GSBRNA2T00000001001,GSBRNA2T00015913001…	1.15384e-08
Biological process	response to wounding	GO:0009611	4	1.23688e-11	4.07459	33	980	337	40778	GSBRNA2T00048673001,GSBRNA2T00016167001,GSBRNA2T00129952001,GSBRNA2T00148277001,GSBRNA2T00097858001,GSBRNA2T00118673001,GSBRNA2T00121592001,GSBRNA2T00060582001,GSBRNA2T00052409001,GSBRNA2T00107313001,GSBRNA2T00141601001,GSBRNA2T00136878001,GSBRNA2T00138749001,GSBRNA2T00125345001,GSBRNA2T00135993001,GSBRNA2T00132030001,GSBRNA2T00150793001,GSBRNA2T00154851001,GSBRNA2T00021227001,GSBRNA2T00015913001…	2.16577e-08
Biological process	hydrogen peroxide mediated signaling pathway	GO:0071588	6	1.05e-07	40.3343	5	15	337	40778	GSBRNA2T00156251001,GSBRNA2T00019361001,GSBRNA2T00097387001,GSBRNA2T00122235001,GSBRNA2T00100588001,	3.67711e-05
Biological process	response to organic substance	GO:0010033	4	1.01495e-07	1.63821	102	7534	337	40778	GSBRNA2T00006870001,GSBRNA2T00132937001,GSBRNA2T00134741001,GSBRNA2T00048673001,GSBRNA2T00137307001,GSBRNA2T00104909001,GSBRNA2T00137285001,GSBRNA2T00004321001,GSBRNA2T00082473001,GSBRNA2T00090874001,GSBRNA2T00016167001,GSBRNA2T00156251001,GSBRNA2T00063713001,GSBRNA2T00119748001,GSBRNA2T00136074001,GSBRNA2T00018441001,GSBRNA2T00013313001,GSBRNA2T00129952001,GSBRNA2T00134235001,GSBRNA2T00018451001…	4.44294e-05
Biological process	response to chitin	GO:0010200	6	1.67327e-07	4.24964	19	541	337	40778	GSBRNA2T00137307001,GSBRNA2T00090874001,GSBRNA2T00097858001,GSBRNA2T00121592001,GSBRNA2T00060582001,GSBRNA2T00107313001,GSBRNA2T00132030001,GSBRNA2T00004859001,GSBRNA2T00083596001,GSBRNA2T00130498001,GSBRNA2T00051997001,GSBRNA2T00130821001,GSBRNA2T00146315001,GSBRNA2T00076869001,GSBRNA2T00018765001,GSBRNA2T00145751001,GSBRNA2T00018128001,GSBRNA2T00099375001,GSBRNA2T00009977001,	4.88316e-05
Biological process	response to chemical	GO:0042221	3	8.40447e-08	1.50399	132	10620	337	40778	GSBRNA2T00006870001,GSBRNA2T00132937001,GSBRNA2T00134741001,GSBRNA2T00048673001,GSBRNA2T00142454001,GSBRNA2T00137307001,GSBRNA2T00104909001,GSBRNA2T00137285001,GSBRNA2T00004321001,GSBRNA2T00082473001,GSBRNA2T00090874001,GSBRNA2T00016167001,GSBRNA2T00158101001,GSBRNA2T00156251001,GSBRNA2T00063713001,GSBRNA2T00119748001,GSBRNA2T00136074001,GSBRNA2T00018441001,GSBRNA2T00013313001,GSBRNA2T00129952001…	4.90541e-05
Biological process	response to biotic stimulus	GO:0009607	3	5.55929e-07	1.90701	62	3934	337	40778	GSBRNA2T00134741001,GSBRNA2T00016167001,GSBRNA2T00156251001,GSBRNA2T00018282001,GSBRNA2T00100352001,GSBRNA2T00063713001,GSBRNA2T00018451001,GSBRNA2T00146276001,GSBRNA2T00143311001,GSBRNA2T00060582001,GSBRNA2T00098662001,GSBRNA2T00107313001,GSBRNA2T00035401001,GSBRNA2T00000695001,GSBRNA2T00109906001,GSBRNA2T00059333001,GSBRNA2T00036842001,GSBRNA2T00136878001,GSBRNA2T00128203001,GSBRNA2T00086237001…	9.73432e-05
Biological process	cellular response to jasmonic acid stimulus	GO:0071395	7	5.30241e-07	4.13293	18	527	337	40778	GSBRNA2T00104909001,GSBRNA2T00016167001,GSBRNA2T00018441001,GSBRNA2T00036842001,GSBRNA2T00136878001,GSBRNA2T00134389001,GSBRNA2T00150793001,GSBRNA2T00000001001,GSBRNA2T00011092001,GSBRNA2T00005388001,GSBRNA2T00014999001,GSBRNA2T00076869001,GSBRNA2T00099637001,GSBRNA2T00156015001,GSBRNA2T00018128001,GSBRNA2T00123793001,GSBRNA2T00009977001,GSBRNA2T00018442001,	0.000103161
Biological process	response to external biotic stimulus	GO:0043207	4	5.01122e-07	1.91285	62	3922	337	40778	GSBRNA2T00134741001,GSBRNA2T00016167001,GSBRNA2T00156251001,GSBRNA2T00018282001,GSBRNA2T00100352001,GSBRNA2T00063713001,GSBRNA2T00018451001,GSBRNA2T00146276001,GSBRNA2T00143311001,GSBRNA2T00060582001,GSBRNA2T00098662001,GSBRNA2T00107313001,GSBRNA2T00035401001,GSBRNA2T00000695001,GSBRNA2T00109906001,GSBRNA2T00059333001,GSBRNA2T00036842001,GSBRNA2T00136878001,GSBRNA2T00128203001,GSBRNA2T00086237001…	0.000109683
Biological process	response to other organism	GO:0051707	5	4.63408e-07	1.91725	62	3913	337	40778	GSBRNA2T00134741001,GSBRNA2T00016167001,GSBRNA2T00156251001,GSBRNA2T00018282001,GSBRNA2T00100352001,GSBRNA2T00063713001,GSBRNA2T00018451001,GSBRNA2T00146276001,GSBRNA2T00143311001,GSBRNA2T00060582001,GSBRNA2T00098662001,GSBRNA2T00107313001,GSBRNA2T00035401001,GSBRNA2T00000695001,GSBRNA2T00109906001,GSBRNA2T00059333001,GSBRNA2T00036842001,GSBRNA2T00136878001,GSBRNA2T00128203001,GSBRNA2T00086237001…	0.000115918
Biological process	response to oxygen-containing compound	GO:1901700	4	1.28489e-06	1.65278	85	6223	337	40778	GSBRNA2T00132937001,GSBRNA2T00134741001,GSBRNA2T00048673001,GSBRNA2T00137307001,GSBRNA2T00104909001,GSBRNA2T00137285001,GSBRNA2T00082473001,GSBRNA2T00090874001,GSBRNA2T00016167001,GSBRNA2T00158101001,GSBRNA2T00063713001,GSBRNA2T00119748001,GSBRNA2T00018441001,GSBRNA2T00129952001,GSBRNA2T00134235001,GSBRNA2T00134120001,GSBRNA2T00057839001,GSBRNA2T00097858001,GSBRNA2T00121592001,GSBRNA2T00060582001…	0.000204531
Biological process	response to stimulus	GO:0050896	2	1.52033e-06	1.28177	196	18503	337	40778	GSBRNA2T00006870001,GSBRNA2T00132937001,GSBRNA2T00134741001,GSBRNA2T00048673001,GSBRNA2T00142454001,GSBRNA2T00137307001,GSBRNA2T00104909001,GSBRNA2T00137285001,GSBRNA2T00004321001,GSBRNA2T00082473001,GSBRNA2T00090874001,GSBRNA2T00016167001,GSBRNA2T00158101001,GSBRNA2T00019791001,GSBRNA2T00156251001,GSBRNA2T00018282001,GSBRNA2T00079498001,GSBRNA2T00100352001,GSBRNA2T00063713001,GSBRNA2T00119748001…	0.000204777
Biological process	response to molecule of bacterial origin	GO:0002237	5	1.41603e-06	6.43011	11	207	337	40778	GSBRNA2T00156251001,GSBRNA2T00146276001,GSBRNA2T00060582001,GSBRNA2T00132030001,GSBRNA2T00130498001,GSBRNA2T00019361001,GSBRNA2T00146315001,GSBRNA2T00018765001,GSBRNA2T00097387001,GSBRNA2T00122235001,GSBRNA2T00100588001,	0.000206623
Biological process	multi-organism process	GO:0051704	2	1.85845e-06	1.70332	76	5399	337	40778	GSBRNA2T00134741001,GSBRNA2T00140135001,GSBRNA2T00094938001,GSBRNA2T00128143001,GSBRNA2T00016167001,GSBRNA2T00156251001,GSBRNA2T00018282001,GSBRNA2T00100352001,GSBRNA2T00063713001,GSBRNA2T00018451001,GSBRNA2T00146276001,GSBRNA2T00143311001,GSBRNA2T00156918001,GSBRNA2T00060582001,GSBRNA2T00098662001,GSBRNA2T00107313001,GSBRNA2T00035401001,GSBRNA2T00000695001,GSBRNA2T00109906001,GSBRNA2T00059333001…	0.000232439
Biological process	interspecies interaction between organisms	GO:0044419	2	2.03043e-06	1.83427	62	4090	337	40778	GSBRNA2T00134741001,GSBRNA2T00016167001,GSBRNA2T00156251001,GSBRNA2T00018282001,GSBRNA2T00100352001,GSBRNA2T00063713001,GSBRNA2T00018451001,GSBRNA2T00146276001,GSBRNA2T00143311001,GSBRNA2T00060582001,GSBRNA2T00098662001,GSBRNA2T00107313001,GSBRNA2T00035401001,GSBRNA2T00000695001,GSBRNA2T00109906001,GSBRNA2T00059333001,GSBRNA2T00036842001,GSBRNA2T00136878001,GSBRNA2T00128203001,GSBRNA2T00086237001…	0.000237019
Biological process	response to fungus	GO:0009620	6	3.12644e-06	2.66359	28	1272	337	40778	GSBRNA2T00134741001,GSBRNA2T00143311001,GSBRNA2T00060582001,GSBRNA2T00098662001,GSBRNA2T00035401001,GSBRNA2T00000695001,GSBRNA2T00036842001,GSBRNA2T00135993001,GSBRNA2T00132030001,GSBRNA2T00083596001,GSBRNA2T00071648001,GSBRNA2T00130498001,GSBRNA2T00021776001,GSBRNA2T00130821001,GSBRNA2T00146315001,GSBRNA2T00076869001,GSBRNA2T00018765001,GSBRNA2T00090867001,GSBRNA2T00122855001,GSBRNA2T00018128001…	0.00034215
Biological process	jasmonic acid mediated signaling pathway	GO:0009867	7	5.74385e-06	3.84136	16	504	337	40778	GSBRNA2T00104909001,GSBRNA2T00016167001,GSBRNA2T00018441001,GSBRNA2T00036842001,GSBRNA2T00136878001,GSBRNA2T00134389001,GSBRNA2T00150793001,GSBRNA2T00000001001,GSBRNA2T00011092001,GSBRNA2T00005388001,GSBRNA2T00014999001,GSBRNA2T00076869001,GSBRNA2T00099637001,GSBRNA2T00156015001,GSBRNA2T00123793001,GSBRNA2T00018442001,	0.000591617
Biological process	response to drug	GO:0042493	4	7.11831e-06	2.09154	41	2372	337	40778	GSBRNA2T00132937001,GSBRNA2T00142454001,GSBRNA2T00137307001,GSBRNA2T00090874001,GSBRNA2T00038789001,GSBRNA2T00134235001,GSBRNA2T00134120001,GSBRNA2T00097858001,GSBRNA2T00121592001,GSBRNA2T00060582001,GSBRNA2T00107313001,GSBRNA2T00102714001,GSBRNA2T00010430001,GSBRNA2T00135993001,GSBRNA2T00132030001,GSBRNA2T00004859001,GSBRNA2T00083596001,GSBRNA2T00130498001,GSBRNA2T00014646001,GSBRNA2T00089547001…	0.000692453
Biological process	regulation of jasmonic acid mediated signaling pathway	GO:2000022	7	1.09769e-05	6.5604	9	166	337	40778	GSBRNA2T00016167001,GSBRNA2T00136878001,GSBRNA2T00134389001,GSBRNA2T00150793001,GSBRNA2T00011092001,GSBRNA2T00005388001,GSBRNA2T00076869001,GSBRNA2T00099637001,GSBRNA2T00156015001,	0.00096103
Biological process	jasmonic acid metabolic process	GO:0009694	8	1.07943e-05	7.68273	8	126	337	40778	GSBRNA2T00119748001,GSBRNA2T00027807001,GSBRNA2T00141601001,GSBRNA2T00125345001,GSBRNA2T00077985001,GSBRNA2T00090867001,GSBRNA2T00117873001,GSBRNA2T00027803001,	0.000994779
Biological process	negative regulation of short-day photoperiodism, flowering	GO:0048577	9	1.31281e-05	16.3518	5	37	337	40778	GSBRNA2T00155831001,GSBRNA2T00047035001,GSBRNA2T00121984001,GSBRNA2T00067590001,GSBRNA2T00129941001,	0.00109464
Biological process	developmental process involved in reproduction	GO:0003006	3	2.0233e-05	1.63707	70	5174	337	40778	GSBRNA2T00132937001,GSBRNA2T00137307001,GSBRNA2T00090942001,GSBRNA2T00046732001,GSBRNA2T00024373001,GSBRNA2T00094938001,GSBRNA2T00128143001,GSBRNA2T00016167001,GSBRNA2T00156251001,GSBRNA2T00091407001,GSBRNA2T00018441001,GSBRNA2T00013313001,GSBRNA2T00018451001,GSBRNA2T00134120001,GSBRNA2T00057839001,GSBRNA2T00155831001,GSBRNA2T00156918001,GSBRNA2T00007838001,GSBRNA2T00046036001,GSBRNA2T00107313001…	0.00161036
Biological process	response to external stimulus	GO:0009605	3	2.56655e-05	1.61069	72	5409	337	40778	GSBRNA2T00134741001,GSBRNA2T00016167001,GSBRNA2T00156251001,GSBRNA2T00018282001,GSBRNA2T00079498001,GSBRNA2T00100352001,GSBRNA2T00063713001,GSBRNA2T00018451001,GSBRNA2T00146276001,GSBRNA2T00143311001,GSBRNA2T00060582001,GSBRNA2T00098662001,GSBRNA2T00052409001,GSBRNA2T00107313001,GSBRNA2T00035401001,GSBRNA2T00000695001,GSBRNA2T00109906001,GSBRNA2T00059333001,GSBRNA2T00036842001,GSBRNA2T00136878001…	0.00195393
Biological process	response to stress	GO:0006950	3	2.7535e-05	1.39434	119	10327	337	40778	GSBRNA2T00132937001,GSBRNA2T00134741001,GSBRNA2T00048673001,GSBRNA2T00104909001,GSBRNA2T00004321001,GSBRNA2T00016167001,GSBRNA2T00158101001,GSBRNA2T00018282001,GSBRNA2T00079498001,GSBRNA2T00063713001,GSBRNA2T00129952001,GSBRNA2T00134235001,GSBRNA2T00148277001,GSBRNA2T00018451001,GSBRNA2T00146276001,GSBRNA2T00134120001,GSBRNA2T00028840001,GSBRNA2T00143311001,GSBRNA2T00041447001,GSBRNA2T00097858001…	0.00200891
Biological process	defense response to fungus	GO:0050832	7	3.35493e-05	2.67813	22	994	337	40778	GSBRNA2T00134741001,GSBRNA2T00143311001,GSBRNA2T00060582001,GSBRNA2T00098662001,GSBRNA2T00035401001,GSBRNA2T00000695001,GSBRNA2T00036842001,GSBRNA2T00132030001,GSBRNA2T00083596001,GSBRNA2T00130498001,GSBRNA2T00021776001,GSBRNA2T00130821001,GSBRNA2T00146315001,GSBRNA2T00076869001,GSBRNA2T00018765001,GSBRNA2T00122855001,GSBRNA2T00018128001,GSBRNA2T00047517001,GSBRNA2T00086407001,GSBRNA2T00009977001…	0.00234979
Biological process	response to acid chemical	GO:0001101	4	3.73226e-05	1.67945	61	4395	337	40778	GSBRNA2T00132937001,GSBRNA2T00134741001,GSBRNA2T00048673001,GSBRNA2T00104909001,GSBRNA2T00137285001,GSBRNA2T00016167001,GSBRNA2T00158101001,GSBRNA2T00063713001,GSBRNA2T00119748001,GSBRNA2T00018441001,GSBRNA2T00129952001,GSBRNA2T00134235001,GSBRNA2T00134120001,GSBRNA2T00097858001,GSBRNA2T00121592001,GSBRNA2T00060582001,GSBRNA2T00007838001,GSBRNA2T00107313001,GSBRNA2T00036842001,GSBRNA2T00136878001…	0.00251354
Biological process	reproductive process	GO:0022414	2	4.66292e-05	1.56227	75	5809	337	40778	GSBRNA2T00132937001,GSBRNA2T00137307001,GSBRNA2T00090942001,GSBRNA2T00046732001,GSBRNA2T00024373001,GSBRNA2T00094938001,GSBRNA2T00128143001,GSBRNA2T00016167001,GSBRNA2T00156251001,GSBRNA2T00091407001,GSBRNA2T00090920001,GSBRNA2T00018441001,GSBRNA2T00013313001,GSBRNA2T00018451001,GSBRNA2T00134120001,GSBRNA2T00057839001,GSBRNA2T00155831001,GSBRNA2T00156918001,GSBRNA2T00007838001,GSBRNA2T00046036001…	0.00302399
Biological process	reproduction	GO:0000003	2	5.52985e-05	1.55424	75	5839	337	40778	GSBRNA2T00132937001,GSBRNA2T00137307001,GSBRNA2T00090942001,GSBRNA2T00046732001,GSBRNA2T00024373001,GSBRNA2T00094938001,GSBRNA2T00128143001,GSBRNA2T00016167001,GSBRNA2T00156251001,GSBRNA2T00091407001,GSBRNA2T00090920001,GSBRNA2T00018441001,GSBRNA2T00013313001,GSBRNA2T00018451001,GSBRNA2T00134120001,GSBRNA2T00057839001,GSBRNA2T00155831001,GSBRNA2T00156918001,GSBRNA2T00007838001,GSBRNA2T00046036001…	0.00345813
Biological process	reproductive system development	GO:0061458	5	6.21065e-05	1.66803	59	4280	337	40778	GSBRNA2T00132937001,GSBRNA2T00137307001,GSBRNA2T00090942001,GSBRNA2T00046732001,GSBRNA2T00024373001,GSBRNA2T00016167001,GSBRNA2T00156251001,GSBRNA2T00091407001,GSBRNA2T00018441001,GSBRNA2T00013313001,GSBRNA2T00018451001,GSBRNA2T00134120001,GSBRNA2T00057839001,GSBRNA2T00155831001,GSBRNA2T00007838001,GSBRNA2T00046036001,GSBRNA2T00107313001,GSBRNA2T00146596001,GSBRNA2T00047035001,GSBRNA2T00051474001…	0.00362495
Biological process	reproductive structure development	GO:0048608	4	6.21065e-05	1.66803	59	4280	337	40778	GSBRNA2T00132937001,GSBRNA2T00137307001,GSBRNA2T00090942001,GSBRNA2T00046732001,GSBRNA2T00024373001,GSBRNA2T00016167001,GSBRNA2T00156251001,GSBRNA2T00091407001,GSBRNA2T00018441001,GSBRNA2T00013313001,GSBRNA2T00018451001,GSBRNA2T00134120001,GSBRNA2T00057839001,GSBRNA2T00155831001,GSBRNA2T00007838001,GSBRNA2T00046036001,GSBRNA2T00107313001,GSBRNA2T00146596001,GSBRNA2T00047035001,GSBRNA2T00051474001…	0.00362495
Biological process	biosynthetic process	GO:0009058	3	6.12975e-05	1.29003	154	14445	337	40778	GSBRNA2T00132937001,GSBRNA2T00134741001,GSBRNA2T00048673001,GSBRNA2T00050254001,GSBRNA2T00137307001,GSBRNA2T00104909001,GSBRNA2T00046732001,GSBRNA2T00024373001,GSBRNA2T00016167001,GSBRNA2T00158101001,GSBRNA2T00089173001,GSBRNA2T00146496001,GSBRNA2T00019791001,GSBRNA2T00156251001,GSBRNA2T00079498001,GSBRNA2T00100352001,GSBRNA2T00136074001,GSBRNA2T00013313001,GSBRNA2T00090917001,GSBRNA2T00129952001…	0.0037011
Biological process	response to abiotic stimulus	GO:0009628	3	8.11742e-05	1.461	90	7454	337	40778	GSBRNA2T00132937001,GSBRNA2T00134741001,GSBRNA2T00137307001,GSBRNA2T00104909001,GSBRNA2T00004321001,GSBRNA2T00016167001,GSBRNA2T00158101001,GSBRNA2T00019791001,GSBRNA2T00018282001,GSBRNA2T00063713001,GSBRNA2T00129952001,GSBRNA2T00134235001,GSBRNA2T00073193001,GSBRNA2T00146276001,GSBRNA2T00006630001,GSBRNA2T00134120001,GSBRNA2T00028840001,GSBRNA2T00097858001,GSBRNA2T00155831001,GSBRNA2T00121592001…	0.00430715
Biological process	nitrogen cycle metabolic process	GO:0071941	4	0.00010118	10.8038	5	56	337	40778	GSBRNA2T00146496001,GSBRNA2T00079498001,GSBRNA2T00143205001,GSBRNA2T00093528001,GSBRNA2T00135415001,	0.00521078
Biological process	response to organonitrogen compound	GO:0010243	5	0.000123981	2.3889	23	1165	337	40778	GSBRNA2T00132937001,GSBRNA2T00137307001,GSBRNA2T00090874001,GSBRNA2T00097858001,GSBRNA2T00121592001,GSBRNA2T00060582001,GSBRNA2T00107313001,GSBRNA2T00130602001,GSBRNA2T00132030001,GSBRNA2T00004859001,GSBRNA2T00083596001,GSBRNA2T00130498001,GSBRNA2T00051997001,GSBRNA2T00130821001,GSBRNA2T00146315001,GSBRNA2T00076869001,GSBRNA2T00018765001,GSBRNA2T00145751001,GSBRNA2T00018128001,GSBRNA2T00073198001…	0.0060303
Biological process	response to salicylic acid	GO:0009751	6	0.000129152	2.74314	18	794	337	40778	GSBRNA2T00132937001,GSBRNA2T00134235001,GSBRNA2T00134120001,GSBRNA2T00097858001,GSBRNA2T00121592001,GSBRNA2T00060582001,GSBRNA2T00010430001,GSBRNA2T00135993001,GSBRNA2T00132030001,GSBRNA2T00130498001,GSBRNA2T00089547001,GSBRNA2T00014999001,GSBRNA2T00146315001,GSBRNA2T00076869001,GSBRNA2T00018765001,GSBRNA2T00090867001,GSBRNA2T00073198001,GSBRNA2T00143391001,	0.00611204
Biological process	response to hormone	GO:0009725	5	0.000123032	1.51633	75	5985	337	40778	GSBRNA2T00006870001,GSBRNA2T00132937001,GSBRNA2T00134741001,GSBRNA2T00048673001,GSBRNA2T00104909001,GSBRNA2T00137285001,GSBRNA2T00004321001,GSBRNA2T00082473001,GSBRNA2T00016167001,GSBRNA2T00063713001,GSBRNA2T00119748001,GSBRNA2T00136074001,GSBRNA2T00018441001,GSBRNA2T00013313001,GSBRNA2T00129952001,GSBRNA2T00134235001,GSBRNA2T00100145001,GSBRNA2T00134120001,GSBRNA2T00095539001,GSBRNA2T00057839001…	0.00615511
Cellular component	external encapsulating structure	GO:0030312	3	1.21458e-13	3.19006	52	2143	304	39966	GSBRNA2T00004321001,GSBRNA2T00024373001,GSBRNA2T00059182001,GSBRNA2T00103354001,GSBRNA2T00063713001,GSBRNA2T00121376001,GSBRNA2T00105340001,GSBRNA2T00071518001,GSBRNA2T00099032001,GSBRNA2T00028840001,GSBRNA2T00081032001,GSBRNA2T00085465001,GSBRNA2T00094331001,GSBRNA2T00140846001,GSBRNA2T00098662001,GSBRNA2T00009508001,GSBRNA2T00089606001,GSBRNA2T00086413001,GSBRNA2T00155291001,GSBRNA2T00016719001…	1.70042e-11
Cellular component	cell wall	GO:0005618	4	1.15463e-13	3.19453	52	2140	304	39966	GSBRNA2T00004321001,GSBRNA2T00024373001,GSBRNA2T00059182001,GSBRNA2T00103354001,GSBRNA2T00063713001,GSBRNA2T00121376001,GSBRNA2T00105340001,GSBRNA2T00071518001,GSBRNA2T00099032001,GSBRNA2T00028840001,GSBRNA2T00081032001,GSBRNA2T00085465001,GSBRNA2T00094331001,GSBRNA2T00140846001,GSBRNA2T00098662001,GSBRNA2T00009508001,GSBRNA2T00089606001,GSBRNA2T00086413001,GSBRNA2T00155291001,GSBRNA2T00016719001…	3.23297e-11
Cellular component	extracellular region	GO:0005576	3	2.09852e-08	2.69712	39	1901	304	39966	GSBRNA2T00004321001,GSBRNA2T00094938001,GSBRNA2T00128143001,GSBRNA2T00059182001,GSBRNA2T00103354001,GSBRNA2T00063713001,GSBRNA2T00081032001,GSBRNA2T00085465001,GSBRNA2T00036872001,GSBRNA2T00094331001,GSBRNA2T00140846001,GSBRNA2T00098662001,GSBRNA2T00089606001,GSBRNA2T00016719001,GSBRNA2T00116439001,GSBRNA2T00071647001,GSBRNA2T00125192001,GSBRNA2T00086247001,GSBRNA2T00140403001,GSBRNA2T00144446001…	1.95862e-06
Cellular component	plant-type cell wall	GO:0009505	5	1.12848e-06	3.21333	23	941	304	39966	GSBRNA2T00004321001,GSBRNA2T00063713001,GSBRNA2T00105340001,GSBRNA2T00081032001,GSBRNA2T00094331001,GSBRNA2T00140846001,GSBRNA2T00098662001,GSBRNA2T00155291001,GSBRNA2T00086527001,GSBRNA2T00071647001,GSBRNA2T00092510001,GSBRNA2T00071648001,GSBRNA2T00136136001,GSBRNA2T00081358001,GSBRNA2T00086415001,GSBRNA2T00086128001,GSBRNA2T00018128001,GSBRNA2T00093833001,GSBRNA2T00096589001,GSBRNA2T00047517001…	7.89935e-05
Cellular component	cell periphery	GO:0071944	3	1.3883e-05	1.41297	116	10793	304	39966	GSBRNA2T00090999001,GSBRNA2T00090942001,GSBRNA2T00076300001,GSBRNA2T00137285001,GSBRNA2T00004321001,GSBRNA2T00024373001,GSBRNA2T00094938001,GSBRNA2T00128143001,GSBRNA2T00059182001,GSBRNA2T00103354001,GSBRNA2T00033161001,GSBRNA2T00018282001,GSBRNA2T00063713001,GSBRNA2T00013313001,GSBRNA2T00134627001,GSBRNA2T00138909001,GSBRNA2T00121376001,GSBRNA2T00100354001,GSBRNA2T00105340001,GSBRNA2T00138784001…	0.000777449
Cellular component	apoplast	GO:0048046	4	5.52191e-05	2.5847	22	1119	304	39966	GSBRNA2T00004321001,GSBRNA2T00094938001,GSBRNA2T00128143001,GSBRNA2T00103354001,GSBRNA2T00063713001,GSBRNA2T00081032001,GSBRNA2T00094331001,GSBRNA2T00140846001,GSBRNA2T00098662001,GSBRNA2T00116439001,GSBRNA2T00071647001,GSBRNA2T00086247001,GSBRNA2T00071648001,GSBRNA2T00081358001,GSBRNA2T00120775001,GSBRNA2T00086128001,GSBRNA2T00018128001,GSBRNA2T00047517001,GSBRNA2T00009977001,GSBRNA2T00143334001…	0.00257689
Cellular component	extracellular matrix	GO:0031012	3	0.000107927	8.04901	6	98	304	39966	GSBRNA2T00004321001,GSBRNA2T00103354001,GSBRNA2T00094331001,GSBRNA2T00140846001,GSBRNA2T00140403001,GSBRNA2T00081358001,	0.00431707
Molecular function	polygalacturonase activity	GO:0004650	6	6.71119e-08	19.4034	7	42	302	35159	GSBRNA2T00059182001,GSBRNA2T00085465001,GSBRNA2T00089606001,GSBRNA2T00016719001,GSBRNA2T00048242001,GSBRNA2T00150685001,GSBRNA2T00150427001,	3.52337e-05
Molecular function	ligase activity, forming carbon-nitrogen bonds	GO:0016879	4	3.60009e-06	6.54048	10	178	302	35159	GSBRNA2T00050254001,GSBRNA2T00079498001,GSBRNA2T00038789001,GSBRNA2T00143205001,GSBRNA2T00093528001,GSBRNA2T00135415001,GSBRNA2T00107195001,GSBRNA2T00068307001,GSBRNA2T00143391001,GSBRNA2T00014014001,	0.000630016
Molecular function	hydrolase activity, hydrolyzing O-glycosyl compounds	GO:0004553	5	5.23236e-06	3.22942	20	721	302	35159	GSBRNA2T00090999001,GSBRNA2T00059182001,GSBRNA2T00063713001,GSBRNA2T00121376001,GSBRNA2T00071518001,GSBRNA2T00081032001,GSBRNA2T00085465001,GSBRNA2T00089606001,GSBRNA2T00016719001,GSBRNA2T00086527001,GSBRNA2T00126366001,GSBRNA2T00086247001,GSBRNA2T00158336001,GSBRNA2T00023076001,GSBRNA2T00071648001,GSBRNA2T00048242001,GSBRNA2T00150685001,GSBRNA2T00150427001,GSBRNA2T00130886001,GSBRNA2T00023872001,	0.000686747
Molecular function	hydrolase activity, acting on glycosyl bonds	GO:0016798	4	1.60558e-05	2.98897	20	779	302	35159	GSBRNA2T00090999001,GSBRNA2T00059182001,GSBRNA2T00063713001,GSBRNA2T00121376001,GSBRNA2T00071518001,GSBRNA2T00081032001,GSBRNA2T00085465001,GSBRNA2T00089606001,GSBRNA2T00016719001,GSBRNA2T00086527001,GSBRNA2T00126366001,GSBRNA2T00086247001,GSBRNA2T00158336001,GSBRNA2T00023076001,GSBRNA2T00071648001,GSBRNA2T00048242001,GSBRNA2T00150685001,GSBRNA2T00150427001,GSBRNA2T00130886001,GSBRNA2T00023872001,	0.00168586
Molecular function	pectinesterase inhibitor activity	GO:0046910	5	3.05132e-05	5.75706	9	182	302	35159	GSBRNA2T00094938001,GSBRNA2T00128143001,GSBRNA2T00138909001,GSBRNA2T00138784001,GSBRNA2T00111896001,GSBRNA2T00022521001,GSBRNA2T00134589001,GSBRNA2T00071611001,GSBRNA2T00055435001,	0.00200243
Molecular function	molecular function regulator	GO:0098772	2	7.26931e-05	1.48396	84	6590	302	35159	GSBRNA2T00132937001,GSBRNA2T00134741001,GSBRNA2T00137307001,GSBRNA2T00104909001,GSBRNA2T00046732001,GSBRNA2T00024373001,GSBRNA2T00094938001,GSBRNA2T00128143001,GSBRNA2T00016167001,GSBRNA2T00158101001,GSBRNA2T00019791001,GSBRNA2T00156251001,GSBRNA2T00134235001,GSBRNA2T00018451001,GSBRNA2T00138909001,GSBRNA2T00138784001,GSBRNA2T00100145001,GSBRNA2T00134120001,GSBRNA2T00068678001,GSBRNA2T00036872001…	0.00424043
Molecular function	transcription regulator activity	GO:0140110	3	9.88924e-05	1.54271	71	5358	302	35159	GSBRNA2T00132937001,GSBRNA2T00134741001,GSBRNA2T00137307001,GSBRNA2T00104909001,GSBRNA2T00046732001,GSBRNA2T00024373001,GSBRNA2T00016167001,GSBRNA2T00158101001,GSBRNA2T00019791001,GSBRNA2T00156251001,GSBRNA2T00134235001,GSBRNA2T00018451001,GSBRNA2T00100145001,GSBRNA2T00134120001,GSBRNA2T00068678001,GSBRNA2T00057839001,GSBRNA2T00155831001,GSBRNA2T00060582001,GSBRNA2T00046036001,GSBRNA2T00146596001…	0.00519185
Molecular function	pectinesterase activity	GO:0030599	6	0.000139583	5.35267	8	174	302	35159	GSBRNA2T00138909001,GSBRNA2T00138784001,GSBRNA2T00111896001,GSBRNA2T00022521001,GSBRNA2T00136136001,GSBRNA2T00134589001,GSBRNA2T00071611001,GSBRNA2T00055435001,	0.00666193

## Sheet: common_DEG_GO
Class	GO_Name	GO_ID	GO_Level	P_value	EnrichmentScore	HitsGenesCountsInSelectedSet	HitsGenesCountsInBackground	AllGenesCountsInSelectedSet	AllGenesCountsInBackground	GenesOfSelectedSetInGOterm	corrected p-value(BH method)
Biological process	response to wounding	GO:0009611	4	3.26649e-11	4.89532	26	980	221	40778	GSBRNA2T00048673001,GSBRNA2T00016167001,GSBRNA2T00129952001,GSBRNA2T00148277001,GSBRNA2T00118673001,GSBRNA2T00060582001,GSBRNA2T00052409001,GSBRNA2T00107313001,GSBRNA2T00136878001,GSBRNA2T00138749001,GSBRNA2T00125345001,GSBRNA2T00135993001,GSBRNA2T00132030001,GSBRNA2T00150793001,GSBRNA2T00154851001,GSBRNA2T00021227001,GSBRNA2T00015913001,GSBRNA2T00146315001,GSBRNA2T00018765001,GSBRNA2T00090867001…	4.39996e-08
Biological process	response to jasmonic acid	GO:0009753	6	6.6596e-08	3.90322	22	1040	221	40778	GSBRNA2T00048673001,GSBRNA2T00104909001,GSBRNA2T00016167001,GSBRNA2T00018441001,GSBRNA2T00129952001,GSBRNA2T00136878001,GSBRNA2T00134389001,GSBRNA2T00138749001,GSBRNA2T00135993001,GSBRNA2T00150793001,GSBRNA2T00154851001,GSBRNA2T00000001001,GSBRNA2T00015913001,GSBRNA2T00076869001,GSBRNA2T00090867001,GSBRNA2T00099637001,GSBRNA2T00156015001,GSBRNA2T00018128001,GSBRNA2T00085032001,GSBRNA2T00009977001…	4.48524e-05
Biological process	cellular response to jasmonic acid stimulus	GO:0071395	7	7.10672e-06	4.55162	13	527	221	40778	GSBRNA2T00104909001,GSBRNA2T00016167001,GSBRNA2T00018441001,GSBRNA2T00136878001,GSBRNA2T00134389001,GSBRNA2T00150793001,GSBRNA2T00000001001,GSBRNA2T00076869001,GSBRNA2T00099637001,GSBRNA2T00156015001,GSBRNA2T00018128001,GSBRNA2T00009977001,GSBRNA2T00018442001,	0.00119659
Biological process	response to fungus	GO:0009620	6	6.81994e-06	3.04625	21	1272	221	40778	GSBRNA2T00134741001,GSBRNA2T00143311001,GSBRNA2T00060582001,GSBRNA2T00098662001,GSBRNA2T00035401001,GSBRNA2T00135993001,GSBRNA2T00132030001,GSBRNA2T00071648001,GSBRNA2T00130498001,GSBRNA2T00021776001,GSBRNA2T00146315001,GSBRNA2T00076869001,GSBRNA2T00018765001,GSBRNA2T00090867001,GSBRNA2T00018128001,GSBRNA2T00117873001,GSBRNA2T00047517001,GSBRNA2T00009977001,GSBRNA2T00023872001,GSBRNA2T00027803001…	0.00131235
Biological process	response to biotic stimulus	GO:0009607	3	6.68047e-06	2.01682	43	3934	221	40778	GSBRNA2T00134741001,GSBRNA2T00016167001,GSBRNA2T00018282001,GSBRNA2T00100352001,GSBRNA2T00018451001,GSBRNA2T00146276001,GSBRNA2T00143311001,GSBRNA2T00060582001,GSBRNA2T00098662001,GSBRNA2T00107313001,GSBRNA2T00035401001,GSBRNA2T00059333001,GSBRNA2T00136878001,GSBRNA2T00128203001,GSBRNA2T00138749001,GSBRNA2T00125345001,GSBRNA2T00135993001,GSBRNA2T00086269001,GSBRNA2T00132030001,GSBRNA2T00086247001…	0.00149976
Biological process	response to external biotic stimulus	GO:0043207	4	6.18928e-06	2.02299	43	3922	221	40778	GSBRNA2T00134741001,GSBRNA2T00016167001,GSBRNA2T00018282001,GSBRNA2T00100352001,GSBRNA2T00018451001,GSBRNA2T00146276001,GSBRNA2T00143311001,GSBRNA2T00060582001,GSBRNA2T00098662001,GSBRNA2T00107313001,GSBRNA2T00035401001,GSBRNA2T00059333001,GSBRNA2T00136878001,GSBRNA2T00128203001,GSBRNA2T00138749001,GSBRNA2T00125345001,GSBRNA2T00135993001,GSBRNA2T00086269001,GSBRNA2T00132030001,GSBRNA2T00086247001…	0.00166739
Biological process	response to other organism	GO:0051707	5	5.84313e-06	2.02765	43	3913	221	40778	GSBRNA2T00134741001,GSBRNA2T00016167001,GSBRNA2T00018282001,GSBRNA2T00100352001,GSBRNA2T00018451001,GSBRNA2T00146276001,GSBRNA2T00143311001,GSBRNA2T00060582001,GSBRNA2T00098662001,GSBRNA2T00107313001,GSBRNA2T00035401001,GSBRNA2T00059333001,GSBRNA2T00136878001,GSBRNA2T00128203001,GSBRNA2T00138749001,GSBRNA2T00125345001,GSBRNA2T00135993001,GSBRNA2T00086269001,GSBRNA2T00132030001,GSBRNA2T00086247001…	0.00196767
Biological process	multi-organism process	GO:0051704	2	4.77329e-06	1.8455	54	5399	221	40778	GSBRNA2T00134741001,GSBRNA2T00094938001,GSBRNA2T00128143001,GSBRNA2T00016167001,GSBRNA2T00018282001,GSBRNA2T00100352001,GSBRNA2T00018451001,GSBRNA2T00146276001,GSBRNA2T00143311001,GSBRNA2T00156918001,GSBRNA2T00060582001,GSBRNA2T00098662001,GSBRNA2T00107313001,GSBRNA2T00035401001,GSBRNA2T00059333001,GSBRNA2T00136878001,GSBRNA2T00062229001,GSBRNA2T00031936001,GSBRNA2T00116439001,GSBRNA2T00095197001…	0.00214321
Biological process	interspecies interaction between organisms	GO:0044419	2	1.73735e-05	1.9399	43	4090	221	40778	GSBRNA2T00134741001,GSBRNA2T00016167001,GSBRNA2T00018282001,GSBRNA2T00100352001,GSBRNA2T00018451001,GSBRNA2T00146276001,GSBRNA2T00143311001,GSBRNA2T00060582001,GSBRNA2T00098662001,GSBRNA2T00107313001,GSBRNA2T00035401001,GSBRNA2T00059333001,GSBRNA2T00136878001,GSBRNA2T00128203001,GSBRNA2T00138749001,GSBRNA2T00125345001,GSBRNA2T00135993001,GSBRNA2T00086269001,GSBRNA2T00132030001,GSBRNA2T00086247001…	0.00260024
Biological process	regulation of jasmonic acid mediated signaling pathway	GO:2000022	7	3.65155e-05	7.78079	7	166	221	40778	GSBRNA2T00016167001,GSBRNA2T00136878001,GSBRNA2T00134389001,GSBRNA2T00150793001,GSBRNA2T00076869001,GSBRNA2T00099637001,GSBRNA2T00156015001,	0.00447149
Biological process	response to chitin	GO:0010200	6	4.50625e-05	4.09277	12	541	221	40778	GSBRNA2T00060582001,GSBRNA2T00107313001,GSBRNA2T00132030001,GSBRNA2T00004859001,GSBRNA2T00130498001,GSBRNA2T00146315001,GSBRNA2T00076869001,GSBRNA2T00018765001,GSBRNA2T00145751001,GSBRNA2T00018128001,GSBRNA2T00009977001,GSBRNA2T00099375001,	0.00505827
Biological process	anthocyanin-containing compound metabolic process	GO:0046283	5	6.09941e-05	7.17562	7	180	221	40778	GSBRNA2T00048673001,GSBRNA2T00129952001,GSBRNA2T00006630001,GSBRNA2T00102026001,GSBRNA2T00135361001,GSBRNA2T00063792001,GSBRNA2T00140359001,	0.00631993
Biological process	jasmonic acid metabolic process	GO:0009694	8	6.78646e-05	8.78647	6	126	221	40778	GSBRNA2T00027807001,GSBRNA2T00125345001,GSBRNA2T00077985001,GSBRNA2T00090867001,GSBRNA2T00117873001,GSBRNA2T00027803001,	0.00652955
Biological process	response to external stimulus	GO:0009605	3	9.42354e-05	1.70564	50	5409	221	40778	GSBRNA2T00134741001,GSBRNA2T00016167001,GSBRNA2T00018282001,GSBRNA2T00079498001,GSBRNA2T00100352001,GSBRNA2T00018451001,GSBRNA2T00146276001,GSBRNA2T00143311001,GSBRNA2T00060582001,GSBRNA2T00098662001,GSBRNA2T00052409001,GSBRNA2T00107313001,GSBRNA2T00035401001,GSBRNA2T00059333001,GSBRNA2T00136878001,GSBRNA2T00128203001,GSBRNA2T00062229001,GSBRNA2T00031936001,GSBRNA2T00107195001,GSBRNA2T00138749001…	0.00846234
Biological process	jasmonic acid mediated signaling pathway	GO:0009867	7	0.000107783	4.02713	11	504	221	40778	GSBRNA2T00104909001,GSBRNA2T00016167001,GSBRNA2T00018441001,GSBRNA2T00136878001,GSBRNA2T00134389001,GSBRNA2T00150793001,GSBRNA2T00000001001,GSBRNA2T00076869001,GSBRNA2T00099637001,GSBRNA2T00156015001,GSBRNA2T00018442001,	0.00907394
Biological process	response to stress	GO:0006950	3	0.00012213	1.44725	81	10327	221	40778	GSBRNA2T00134741001,GSBRNA2T00048673001,GSBRNA2T00104909001,GSBRNA2T00004321001,GSBRNA2T00016167001,GSBRNA2T00158101001,GSBRNA2T00018282001,GSBRNA2T00079498001,GSBRNA2T00129952001,GSBRNA2T00148277001,GSBRNA2T00018451001,GSBRNA2T00146276001,GSBRNA2T00028840001,GSBRNA2T00143311001,GSBRNA2T00041447001,GSBRNA2T00118673001,GSBRNA2T00140846001,GSBRNA2T00060582001,GSBRNA2T00116587001,GSBRNA2T00096395001…	0.00913942
Biological process	defense response to fungus	GO:0050832	7	0.000117428	2.97007	16	994	221	40778	GSBRNA2T00134741001,GSBRNA2T00143311001,GSBRNA2T00060582001,GSBRNA2T00098662001,GSBRNA2T00035401001,GSBRNA2T00132030001,GSBRNA2T00130498001,GSBRNA2T00021776001,GSBRNA2T00146315001,GSBRNA2T00076869001,GSBRNA2T00018765001,GSBRNA2T00018128001,GSBRNA2T00047517001,GSBRNA2T00009977001,GSBRNA2T00023872001,GSBRNA2T00071362001,	0.00930441
Biological process	biosynthetic process	GO:0009058	3	0.000140863	1.34124	105	14445	221	40778	GSBRNA2T00134741001,GSBRNA2T00048673001,GSBRNA2T00050254001,GSBRNA2T00104909001,GSBRNA2T00016167001,GSBRNA2T00158101001,GSBRNA2T00089173001,GSBRNA2T00079498001,GSBRNA2T00100352001,GSBRNA2T00136074001,GSBRNA2T00090917001,GSBRNA2T00129952001,GSBRNA2T00018451001,GSBRNA2T00146276001,GSBRNA2T00100145001,GSBRNA2T00006630001,GSBRNA2T00068678001,GSBRNA2T00155831001,GSBRNA2T00086261001,GSBRNA2T00060582001…	0.00998646
Biological process	anthocyanin-containing compound biosynthetic process	GO:0009718	6	0.000157626	9.92021	5	93	221	40778	GSBRNA2T00048673001,GSBRNA2T00129952001,GSBRNA2T00006630001,GSBRNA2T00063792001,GSBRNA2T00140359001,	0.0106161
Biological process	response to oxygen-containing compound	GO:1901700	4	0.00023957	1.60113	54	6223	221	40778	GSBRNA2T00134741001,GSBRNA2T00048673001,GSBRNA2T00104909001,GSBRNA2T00137285001,GSBRNA2T00082473001,GSBRNA2T00016167001,GSBRNA2T00158101001,GSBRNA2T00018441001,GSBRNA2T00129952001,GSBRNA2T00060582001,GSBRNA2T00052409001,GSBRNA2T00107313001,GSBRNA2T00136878001,GSBRNA2T00102714001,GSBRNA2T00134389001,GSBRNA2T00102026001,GSBRNA2T00052392001,GSBRNA2T00155291001,GSBRNA2T00010430001,GSBRNA2T00107195001…	0.0140305
Biological process	jasmonic acid biosynthetic process	GO:0009695	9	0.000254133	8.95708	5	103	221	40778	GSBRNA2T00027807001,GSBRNA2T00077985001,GSBRNA2T00090867001,GSBRNA2T00117873001,GSBRNA2T00027803001,	0.0142632
Biological process	response to stimulus	GO:0050896	2	0.000326459	1.2565	126	18503	221	40778	GSBRNA2T00134741001,GSBRNA2T00048673001,GSBRNA2T00142454001,GSBRNA2T00104909001,GSBRNA2T00004321001,GSBRNA2T00137285001,GSBRNA2T00082473001,GSBRNA2T00016167001,GSBRNA2T00158101001,GSBRNA2T00018282001,GSBRNA2T00079498001,GSBRNA2T00100352001,GSBRNA2T00136074001,GSBRNA2T00018441001,GSBRNA2T00129952001,GSBRNA2T00148277001,GSBRNA2T00018451001,GSBRNA2T00146276001,GSBRNA2T00100145001,GSBRNA2T00006630001…	0.0169131
Biological process	response to organic substance	GO:0010033	4	0.000314493	1.51845	62	7534	221	40778	GSBRNA2T00134741001,GSBRNA2T00048673001,GSBRNA2T00104909001,GSBRNA2T00004321001,GSBRNA2T00137285001,GSBRNA2T00082473001,GSBRNA2T00016167001,GSBRNA2T00136074001,GSBRNA2T00018441001,GSBRNA2T00129952001,GSBRNA2T00018451001,GSBRNA2T00146276001,GSBRNA2T00100145001,GSBRNA2T00140846001,GSBRNA2T00060582001,GSBRNA2T00052409001,GSBRNA2T00107313001,GSBRNA2T00136878001,GSBRNA2T00134389001,GSBRNA2T00120591001…	0.0169449
Biological process	monocarboxylic acid biosynthetic process	GO:0072330	8	0.000401517	3.04791	13	787	221	40778	GSBRNA2T00027807001,GSBRNA2T00010430001,GSBRNA2T00107195001,GSBRNA2T00077985001,GSBRNA2T00070184001,GSBRNA2T00090867001,GSBRNA2T00090939001,GSBRNA2T00117873001,GSBRNA2T00134639001,GSBRNA2T00014014001,GSBRNA2T00027803001,GSBRNA2T00090500001,GSBRNA2T00116561001,	0.0200312
Biological process	response to oomycetes	GO:0002239	6	0.000527577	6.01682	6	184	221	40778	GSBRNA2T00100352001,GSBRNA2T00018451001,GSBRNA2T00059333001,GSBRNA2T00018128001,GSBRNA2T00154252001,GSBRNA2T00009977001,	0.0229241
Biological process	organic substance biosynthetic process	GO:1901576	4	0.000582889	1.31207	100	14063	221	40778	GSBRNA2T00134741001,GSBRNA2T00048673001,GSBRNA2T00050254001,GSBRNA2T00104909001,GSBRNA2T00016167001,GSBRNA2T00158101001,GSBRNA2T00089173001,GSBRNA2T00079498001,GSBRNA2T00090917001,GSBRNA2T00129952001,GSBRNA2T00018451001,GSBRNA2T00146276001,GSBRNA2T00100145001,GSBRNA2T00006630001,GSBRNA2T00068678001,GSBRNA2T00155831001,GSBRNA2T00086261001,GSBRNA2T00060582001,GSBRNA2T00092513001,GSBRNA2T00116587001…	0.024536
Biological process	response to chemical	GO:0042221	3	0.000889649	1.37258	79	10620	221	40778	GSBRNA2T00134741001,GSBRNA2T00048673001,GSBRNA2T00142454001,GSBRNA2T00104909001,GSBRNA2T00004321001,GSBRNA2T00137285001,GSBRNA2T00082473001,GSBRNA2T00016167001,GSBRNA2T00158101001,GSBRNA2T00136074001,GSBRNA2T00018441001,GSBRNA2T00129952001,GSBRNA2T00018451001,GSBRNA2T00146276001,GSBRNA2T00100145001,GSBRNA2T00081032001,GSBRNA2T00140846001,GSBRNA2T00060582001,GSBRNA2T00052409001,GSBRNA2T00107313001…	0.0342388
Biological process	pollination	GO:0009856	3	0.000889274	2.94832	12	751	221	40778	GSBRNA2T00094938001,GSBRNA2T00128143001,GSBRNA2T00156918001,GSBRNA2T00107313001,GSBRNA2T00062229001,GSBRNA2T00031936001,GSBRNA2T00116439001,GSBRNA2T00095197001,GSBRNA2T00009018001,GSBRNA2T00140403001,GSBRNA2T00136136001,GSBRNA2T00023642001,	0.0352309
Biological process	response to molecule of bacterial origin	GO:0002237	5	0.000974234	5.34829	6	207	221	40778	GSBRNA2T00146276001,GSBRNA2T00060582001,GSBRNA2T00132030001,GSBRNA2T00130498001,GSBRNA2T00146315001,GSBRNA2T00018765001,	0.0364526
Biological process	defense response	GO:0006952	4	0.00107309	1.75831	33	3463	221	40778	GSBRNA2T00134741001,GSBRNA2T00016167001,GSBRNA2T00018282001,GSBRNA2T00018451001,GSBRNA2T00146276001,GSBRNA2T00143311001,GSBRNA2T00060582001,GSBRNA2T00098662001,GSBRNA2T00035401001,GSBRNA2T00136878001,GSBRNA2T00128203001,GSBRNA2T00125345001,GSBRNA2T00132030001,GSBRNA2T00150793001,GSBRNA2T00086247001,GSBRNA2T00021227001,GSBRNA2T00130498001,GSBRNA2T00136136001,GSBRNA2T00036925001,GSBRNA2T00021776001…	0.0380381
Biological process	pollen tube development	GO:0048868	4	0.00111401	3.26577	10	565	221	40778	GSBRNA2T00094938001,GSBRNA2T00128143001,GSBRNA2T00156918001,GSBRNA2T00107313001,GSBRNA2T00062229001,GSBRNA2T00031936001,GSBRNA2T00116439001,GSBRNA2T00140403001,GSBRNA2T00136136001,GSBRNA2T00023642001,	0.0384763
Biological process	multi-multicellular organism process	GO:0044706	3	0.00106438	2.88682	12	767	221	40778	GSBRNA2T00094938001,GSBRNA2T00128143001,GSBRNA2T00156918001,GSBRNA2T00107313001,GSBRNA2T00062229001,GSBRNA2T00031936001,GSBRNA2T00116439001,GSBRNA2T00095197001,GSBRNA2T00009018001,GSBRNA2T00140403001,GSBRNA2T00136136001,GSBRNA2T00023642001,	0.0387493
Cellular component	external encapsulating structure	GO:0030312	3	3.9968e-15	3.9451	44	2143	208	39966	GSBRNA2T00004321001,GSBRNA2T00059182001,GSBRNA2T00103354001,GSBRNA2T00121376001,GSBRNA2T00105340001,GSBRNA2T00071518001,GSBRNA2T00099032001,GSBRNA2T00028840001,GSBRNA2T00081032001,GSBRNA2T00085465001,GSBRNA2T00140846001,GSBRNA2T00098662001,GSBRNA2T00009508001,GSBRNA2T00089606001,GSBRNA2T00086413001,GSBRNA2T00155291001,GSBRNA2T00016719001,GSBRNA2T00071647001,GSBRNA2T00125192001,GSBRNA2T00086247001…	4.67626e-13
Cellular component	cell wall	GO:0005618	4	3.88578e-15	3.95063	44	2140	208	39966	GSBRNA2T00004321001,GSBRNA2T00059182001,GSBRNA2T00103354001,GSBRNA2T00121376001,GSBRNA2T00105340001,GSBRNA2T00071518001,GSBRNA2T00099032001,GSBRNA2T00028840001,GSBRNA2T00081032001,GSBRNA2T00085465001,GSBRNA2T00140846001,GSBRNA2T00098662001,GSBRNA2T00009508001,GSBRNA2T00089606001,GSBRNA2T00086413001,GSBRNA2T00155291001,GSBRNA2T00016719001,GSBRNA2T00071647001,GSBRNA2T00125192001,GSBRNA2T00086247001…	9.09273e-13
Cellular component	extracellular region	GO:0005576	3	1.80973e-11	3.63871	36	1901	208	39966	GSBRNA2T00004321001,GSBRNA2T00094938001,GSBRNA2T00128143001,GSBRNA2T00059182001,GSBRNA2T00103354001,GSBRNA2T00081032001,GSBRNA2T00085465001,GSBRNA2T00036872001,GSBRNA2T00140846001,GSBRNA2T00098662001,GSBRNA2T00089606001,GSBRNA2T00016719001,GSBRNA2T00116439001,GSBRNA2T00071647001,GSBRNA2T00125192001,GSBRNA2T00086247001,GSBRNA2T00140403001,GSBRNA2T00144446001,GSBRNA2T00071648001,GSBRNA2T00116499001…	1.41159e-09
Cellular component	cell periphery	GO:0071944	3	6.36427e-07	1.58444	89	10793	208	39966	GSBRNA2T00090999001,GSBRNA2T00004321001,GSBRNA2T00137285001,GSBRNA2T00094938001,GSBRNA2T00128143001,GSBRNA2T00059182001,GSBRNA2T00103354001,GSBRNA2T00018282001,GSBRNA2T00134627001,GSBRNA2T00138909001,GSBRNA2T00121376001,GSBRNA2T00138784001,GSBRNA2T00105340001,GSBRNA2T00071518001,GSBRNA2T00088755001,GSBRNA2T00099032001,GSBRNA2T00028840001,GSBRNA2T00081032001,GSBRNA2T00085465001,GSBRNA2T00070090001…	3.7231e-05
Cellular component	apoplast	GO:0048046	4	7.18527e-06	3.2625	19	1119	208	39966	GSBRNA2T00004321001,GSBRNA2T00094938001,GSBRNA2T00128143001,GSBRNA2T00103354001,GSBRNA2T00081032001,GSBRNA2T00140846001,GSBRNA2T00098662001,GSBRNA2T00116439001,GSBRNA2T00071647001,GSBRNA2T00086247001,GSBRNA2T00071648001,GSBRNA2T00081358001,GSBRNA2T00120775001,GSBRNA2T00086128001,GSBRNA2T00018128001,GSBRNA2T00047517001,GSBRNA2T00009977001,GSBRNA2T00071362001,GSBRNA2T00090500001,	0.00033627
Cellular component	plant-type cell wall	GO:0009505	5	1.00628e-05	3.47126	17	941	208	39966	GSBRNA2T00004321001,GSBRNA2T00105340001,GSBRNA2T00081032001,GSBRNA2T00140846001,GSBRNA2T00098662001,GSBRNA2T00155291001,GSBRNA2T00071647001,GSBRNA2T00071648001,GSBRNA2T00136136001,GSBRNA2T00081358001,GSBRNA2T00086415001,GSBRNA2T00086128001,GSBRNA2T00018128001,GSBRNA2T00047517001,GSBRNA2T00006656001,GSBRNA2T00009977001,GSBRNA2T00071362001,	0.000392449
Cellular component	extracellular matrix	GO:0031012	3	0.000166861	9.80328	5	98	208	39966	GSBRNA2T00004321001,GSBRNA2T00103354001,GSBRNA2T00140846001,GSBRNA2T00140403001,GSBRNA2T00081358001,	0.00557792
Molecular function	polygalacturonase activity	GO:0004650	6	4.09266e-09	29.1534	7	42	201	35159	GSBRNA2T00059182001,GSBRNA2T00085465001,GSBRNA2T00089606001,GSBRNA2T00016719001,GSBRNA2T00048242001,GSBRNA2T00150685001,GSBRNA2T00150427001,	1.6166e-06
Molecular function	pectinesterase inhibitor activity	GO:0046910	5	1.14858e-06	8.64991	9	182	201	35159	GSBRNA2T00094938001,GSBRNA2T00128143001,GSBRNA2T00138909001,GSBRNA2T00138784001,GSBRNA2T00111896001,GSBRNA2T00022521001,GSBRNA2T00134589001,GSBRNA2T00071611001,GSBRNA2T00055435001,	0.000151229
Molecular function	pectinesterase activity	GO:0030599	6	7.81156e-06	8.04232	8	174	201	35159	GSBRNA2T00138909001,GSBRNA2T00138784001,GSBRNA2T00111896001,GSBRNA2T00022521001,GSBRNA2T00136136001,GSBRNA2T00134589001,GSBRNA2T00071611001,GSBRNA2T00055435001,	0.000440795
Molecular function	hydrolase activity, hydrolyzing O-glycosyl compounds	GO:0004553	5	4.55936e-06	3.88173	16	721	201	35159	GSBRNA2T00090999001,GSBRNA2T00059182001,GSBRNA2T00121376001,GSBRNA2T00071518001,GSBRNA2T00081032001,GSBRNA2T00085465001,GSBRNA2T00089606001,GSBRNA2T00016719001,GSBRNA2T00126366001,GSBRNA2T00086247001,GSBRNA2T00071648001,GSBRNA2T00048242001,GSBRNA2T00150685001,GSBRNA2T00150427001,GSBRNA2T00130886001,GSBRNA2T00023872001,	0.000450237
Molecular function	hydrolase activity, acting on glycosyl bonds	GO:0016798	4	1.19237e-05	3.59272	16	779	201	35159	GSBRNA2T00090999001,GSBRNA2T00059182001,GSBRNA2T00121376001,GSBRNA2T00071518001,GSBRNA2T00081032001,GSBRNA2T00085465001,GSBRNA2T00089606001,GSBRNA2T00016719001,GSBRNA2T00126366001,GSBRNA2T00086247001,GSBRNA2T00071648001,GSBRNA2T00048242001,GSBRNA2T00150685001,GSBRNA2T00150427001,GSBRNA2T00130886001,GSBRNA2T00023872001,	0.000588734
Molecular function	carbon-oxygen lyase activity	GO:0016835	4	0.000296476	4.79234	8	292	201	35159	GSBRNA2T00077121001,GSBRNA2T00067730001,GSBRNA2T00138749001,GSBRNA2T00015913001,GSBRNA2T00097865001,GSBRNA2T00081694001,GSBRNA2T00085032001,GSBRNA2T00134639001,	0.013012
Molecular function	ligase activity, forming carbon-nitrogen bonds	GO:0016879	4	0.000582209	5.89619	6	178	201	35159	GSBRNA2T00050254001,GSBRNA2T00079498001,GSBRNA2T00143205001,GSBRNA2T00107195001,GSBRNA2T00068307001,GSBRNA2T00014014001,	0.0191644
Molecular function	oxidoreductase activity	GO:0016491	3	0.000874103	1.86291	29	2723	201	35159	GSBRNA2T00048673001,GSBRNA2T00089173001,GSBRNA2T00018282001,GSBRNA2T00100352001,GSBRNA2T00136074001,GSBRNA2T00148277001,GSBRNA2T00105340001,GSBRNA2T00118673001,GSBRNA2T00006586001,GSBRNA2T00098662001,GSBRNA2T00035401001,GSBRNA2T00120591001,GSBRNA2T00052392001,GSBRNA2T00026530001,GSBRNA2T00125345001,GSBRNA2T00018354001,GSBRNA2T00055407001,GSBRNA2T00115928001,GSBRNA2T00070184001,GSBRNA2T00090867001…	0.0215794
Molecular function	monooxygenase activity	GO:0004497	4	0.000868325	3.37034	10	519	201	35159	GSBRNA2T00089173001,GSBRNA2T00100352001,GSBRNA2T00136074001,GSBRNA2T00148277001,GSBRNA2T00118673001,GSBRNA2T00035401001,GSBRNA2T00125345001,GSBRNA2T00018354001,GSBRNA2T00107166001,GSBRNA2T00068790001,	0.0228659
Molecular function	enzyme inhibitor activity	GO:0004857	4	0.00210057	3.22599	9	488	201	35159	GSBRNA2T00094938001,GSBRNA2T00128143001,GSBRNA2T00138909001,GSBRNA2T00138784001,GSBRNA2T00111896001,GSBRNA2T00022521001,GSBRNA2T00134589001,GSBRNA2T00071611001,GSBRNA2T00055435001,	0.0377148
Molecular function	carboxylic ester hydrolase activity	GO:0052689	5	0.0029355	3.34776	8	418	201	35159	GSBRNA2T00138909001,GSBRNA2T00138784001,GSBRNA2T00111896001,GSBRNA2T00022521001,GSBRNA2T00136136001,GSBRNA2T00134589001,GSBRNA2T00071611001,GSBRNA2T00055435001,	0.0463809

## Sheet: 0-5 stage_DEGs_KEGG
Term Name	MainClass	GeneHitsInSelectedSet	AllGenesInSelectedSet	GeneHitsInBackground	AllGenesInBackground	p-value	enrichFactor	GeneListInSelectedSets	corrected p-value(BH method)
Flavonoid biosynthesis	A09100 Metabolism	26	564	137	23877	5.55112e-16	8.0344	[GSBRNA2T00129952001, GSBRNA2T00068114001, GSBRNA2T00072713001, GSBRNA2T00129251001, GSBRNA2T00105135001, GSBRNA2T00069346001, GSBRNA2T00031571001, GSBRNA2T00135635001, GSBRNA2T00136007001, GSBRNA2T00024512001, GSBRNA2T00016009001, GSBRNA2T00021309001, GSBRNA2T00011253001, GSBRNA2T00088966001, GSBRNA2T00048673001, GSBRNA2T00107166001, GSBRNA2T00136280001, GSBRNA2T00140359001, GSBRNA2T00052592001,…	9.76996e-14
Biosynthesis of other secondary metabolites	A09100 Metabolism	90	564	1570	23877	3.9968e-15	2.42685	[GSBRNA2T00129952001, GSBRNA2T00068114001, GSBRNA2T00066145001, GSBRNA2T00146313001, GSBRNA2T00088001001, GSBRNA2T00072713001, GSBRNA2T00105135001, GSBRNA2T00078955001, GSBRNA2T00131017001, GSBRNA2T00128197001, GSBRNA2T00135635001, GSBRNA2T00054757001, GSBRNA2T00139205001, GSBRNA2T00024512001, GSBRNA2T00138774001, GSBRNA2T00041156001, GSBRNA2T00007760001, GSBRNA2T00078941001, GSBRNA2T00022858001,…	2.34479e-13
Pentose and glucuronate interconversions	A09100 Metabolism	47	564	582	23877	2.44804e-13	3.41881	[GSBRNA2T00014247001, GSBRNA2T00134589001, GSBRNA2T00150685001, GSBRNA2T00077121001, GSBRNA2T00111896001, GSBRNA2T00085465001, GSBRNA2T00070188001, GSBRNA2T00011180001, GSBRNA2T00059182001, GSBRNA2T00138909001, GSBRNA2T00150427001, GSBRNA2T00071611001, GSBRNA2T00136136001, GSBRNA2T00140434001, GSBRNA2T00073119001, GSBRNA2T00067730001, GSBRNA2T00064714001, GSBRNA2T00134487001, GSBRNA2T00120717001,…	1.07714e-11
Carbohydrate metabolism	A09100 Metabolism	149	564	3554	23877	4.67515e-13	1.77488	[GSBRNA2T00014247001, GSBRNA2T00081380001, GSBRNA2T00134589001, GSBRNA2T00150685001, GSBRNA2T00077121001, GSBRNA2T00116587001, GSBRNA2T00111896001, GSBRNA2T00014923001, GSBRNA2T00139205001, GSBRNA2T00032509001, GSBRNA2T00051445001, GSBRNA2T00071611001, GSBRNA2T00037026001, GSBRNA2T00073119001, GSBRNA2T00064823001, GSBRNA2T00007760001, GSBRNA2T00053102001, GSBRNA2T00064714001, GSBRNA2T00134749001,…	1.64565e-11
Valine, leucine and isoleucine degradation	A09100 Metabolism	19	564	196	23877	2.26973e-07	4.10391	[GSBRNA2T00047122001, GSBRNA2T00110474001, GSBRNA2T00039593001, GSBRNA2T00011530001, GSBRNA2T00100125001, GSBRNA2T00064018001, GSBRNA2T00150940001, GSBRNA2T00039592001, GSBRNA2T00052478001, GSBRNA2T00022859001, GSBRNA2T00114120001, GSBRNA2T00022858001, GSBRNA2T00004432001, GSBRNA2T00027623001, GSBRNA2T00125277001, GSBRNA2T00072383001, GSBRNA2T00095199001, GSBRNA2T00004542001, GSBRNA2T00033460001]	6.65787e-06
Phenylpropanoid biosynthesis	A09100 Metabolism	43	564	790	23877	3.9056e-07	2.30432	[GSBRNA2T00149293001, GSBRNA2T00146313001, GSBRNA2T00079969001, GSBRNA2T00128737001, GSBRNA2T00105135001, GSBRNA2T00131017001, GSBRNA2T00128197001, GSBRNA2T00063439001, GSBRNA2T00083043001, GSBRNA2T00043752001, GSBRNA2T00112411001, GSBRNA2T00054757001, GSBRNA2T00139205001, GSBRNA2T00024512001, GSBRNA2T00118907001, GSBRNA2T00007760001, GSBRNA2T00078941001, GSBRNA2T00063792001, GSBRNA2T00078939001,…	9.81978e-06
Amino acid metabolism	A09100 Metabolism	89	564	2218	23877	4.7704e-07	1.69875	[GSBRNA2T00066145001, GSBRNA2T00044709001, GSBRNA2T00002582001, GSBRNA2T00090998001, GSBRNA2T00095912001, GSBRNA2T00049203001, GSBRNA2T00117790001, GSBRNA2T00083863001, GSBRNA2T00138774001, GSBRNA2T00041156001, GSBRNA2T00022858001, GSBRNA2T00125277001, GSBRNA2T00004542001, GSBRNA2T00067577001, GSBRNA2T00151270001, GSBRNA2T00110474001, GSBRNA2T00048188001, GSBRNA2T00091375001, GSBRNA2T00108232001,…	1.04949e-05
Ascorbate and aldarate metabolism	A09100 Metabolism	17	564	209	23877	1.06099e-05	3.44353	[GSBRNA2T00100125001, GSBRNA2T00076418001, GSBRNA2T00055407001, GSBRNA2T00113662001, GSBRNA2T00137699001, GSBRNA2T00120591001, GSBRNA2T00023807001, GSBRNA2T00032509001, GSBRNA2T00023808001, GSBRNA2T00123616001, GSBRNA2T00114120001, GSBRNA2T00115928001, GSBRNA2T00027623001, GSBRNA2T00026279001, GSBRNA2T00079391001, GSBRNA2T00123615001, GSBRNA2T00154173001]	0.000207483
Stilbenoid, diarylheptanoid and gingerol biosynthesis	A09100 Metabolism	10	564	88	23877	4.31947e-05	4.81081	[GSBRNA2T00129952001, GSBRNA2T00140359001, GSBRNA2T00052592001, GSBRNA2T00146066001, GSBRNA2T00105135001, GSBRNA2T00021309001, GSBRNA2T00031571001, GSBRNA2T00135635001, GSBRNA2T00043434001, GSBRNA2T00024512001]	0.000760227
Starch and sucrose metabolism	A09100 Metabolism	32	564	660	23877	0.000112271	2.05261	[GSBRNA2T00149293001, GSBRNA2T00081032001, GSBRNA2T00046506001, GSBRNA2T00116587001, GSBRNA2T00128197001, GSBRNA2T00020794001, GSBRNA2T00000775001, GSBRNA2T00139205001, GSBRNA2T00051445001, GSBRNA2T00058021001, GSBRNA2T00003564001, GSBRNA2T00007760001, GSBRNA2T00100254001, GSBRNA2T00134749001, GSBRNA2T00150954001, GSBRNA2T00148002001, GSBRNA2T00023872001, GSBRNA2T00061417001, GSBRNA2T00101037001,…	0.00179634
alpha-Linolenic acid metabolism	A09100 Metabolism	14	564	188	23877	0.000161119	3.15261	[GSBRNA2T00090867001, GSBRNA2T00072993001, GSBRNA2T00139182001, GSBRNA2T00027803001, GSBRNA2T00078774001, GSBRNA2T00027807001, GSBRNA2T00134772001, GSBRNA2T00042422001, GSBRNA2T00077985001, GSBRNA2T00028223001, GSBRNA2T00136406001, GSBRNA2T00095199001, GSBRNA2T00094910001, GSBRNA2T00117873001]	0.0021813
Glucosinolate biosynthesis	A09100 Metabolism	15	564	213	23877	0.000176494	2.98135	[GSBRNA2T00047122001, GSBRNA2T00066145001, GSBRNA2T00039593001, GSBRNA2T00154709001, GSBRNA2T00039592001, GSBRNA2T00150971001, GSBRNA2T00138774001, GSBRNA2T00041156001, GSBRNA2T00022859001, GSBRNA2T00022858001, GSBRNA2T00067578001, GSBRNA2T00086160001, GSBRNA2T00067577001, GSBRNA2T00068760001, GSBRNA2T00041456001]	0.00221878
Galactose metabolism	A09100 Metabolism	16	564	242	23877	0.000223996	2.79902	[GSBRNA2T00087819001, GSBRNA2T00081380001, GSBRNA2T00023872001, GSBRNA2T00081032001, GSBRNA2T00012909001, GSBRNA2T00101037001, GSBRNA2T00015236001, GSBRNA2T00004621001, GSBRNA2T00116188001, GSBRNA2T00086128001, GSBRNA2T00053102001, GSBRNA2T00071647001, GSBRNA2T00071648001, GSBRNA2T00021776001, GSBRNA2T00130027001, GSBRNA2T00047440001]	0.00262822
Tyrosine metabolism	A09100 Metabolism	16	564	243	23877	0.000234675	2.7875	[GSBRNA2T00120365001, GSBRNA2T00066145001, GSBRNA2T00043891001, GSBRNA2T00091375001, GSBRNA2T00073644001, GSBRNA2T00049203001, GSBRNA2T00154709001, GSBRNA2T00117790001, GSBRNA2T00031741001, GSBRNA2T00041448001, GSBRNA2T00065785001, GSBRNA2T00138774001, GSBRNA2T00032032001, GSBRNA2T00122127001, GSBRNA2T00058113001, GSBRNA2T00041456001]	0.00258143
Circadian rhythm - plant	A09150 Organismal Systems	15	564	220	23877	0.000250733	2.88648	[GSBRNA2T00129952001, GSBRNA2T00015003001, GSBRNA2T00140359001, GSBRNA2T00150502001, GSBRNA2T00071649001, GSBRNA2T00153841001, GSBRNA2T00085393001, GSBRNA2T00031571001, GSBRNA2T00135635001, GSBRNA2T00102210001, GSBRNA2T00044902001, GSBRNA2T00034511001, GSBRNA2T00096918001, GSBRNA2T00137481001, GSBRNA2T00114307001]	0.00259583
Lipid metabolism	A09100 Metabolism	67	564	1855	23877	0.000336192	1.52908	[GSBRNA2T00073183001, GSBRNA2T00038172001, GSBRNA2T00127142001, GSBRNA2T00139182001, GSBRNA2T00074279001, GSBRNA2T00130851001, GSBRNA2T00004621001, GSBRNA2T00121264001, GSBRNA2T00053102001, GSBRNA2T00071647001, GSBRNA2T00136406001, GSBRNA2T00131161001, GSBRNA2T00146276001, GSBRNA2T00009609001, GSBRNA2T00124760001, GSBRNA2T00072993001, GSBRNA2T00078774001, GSBRNA2T00125356001, GSBRNA2T00068790001,…	0.00328721
Cytochrome P450	A09180 Brite Hierarchies	22	564	441	23877	0.000886942	2.11196	[GSBRNA2T00033413001, GSBRNA2T00068788001, GSBRNA2T00105135001, GSBRNA2T00131017001, GSBRNA2T00039051001, GSBRNA2T00121465001, GSBRNA2T00020816001, GSBRNA2T00043434001, GSBRNA2T00009923001, GSBRNA2T00024512001, GSBRNA2T00068790001, GSBRNA2T00008733001, GSBRNA2T00083863001, GSBRNA2T00150971001, GSBRNA2T00131134001, GSBRNA2T00136074001, GSBRNA2T00023510001, GSBRNA2T00121572001, GSBRNA2T00107166001,…	0.00821589
Tryptophan metabolism	A09100 Metabolism	21	564	413	23877	0.00090675	2.15263	[GSBRNA2T00066145001, GSBRNA2T00062630001, GSBRNA2T00100125001, GSBRNA2T00154709001, GSBRNA2T00060776001, GSBRNA2T00116561001, GSBRNA2T00083863001, GSBRNA2T00150971001, GSBRNA2T00065785001, GSBRNA2T00138774001, GSBRNA2T00041156001, GSBRNA2T00114120001, GSBRNA2T00027623001, GSBRNA2T00072383001, GSBRNA2T00067578001, GSBRNA2T00086160001, GSBRNA2T00033460001, GSBRNA2T00058113001, GSBRNA2T00067577001,…	0.0079794
Metabolism of other amino acids	A09100 Metabolism	42	564	1074	23877	0.00102629	1.65556	[GSBRNA2T00149293001, GSBRNA2T00044812001, GSBRNA2T00100125001, GSBRNA2T00096592001, GSBRNA2T00128197001, GSBRNA2T00104981001, GSBRNA2T00036837001, GSBRNA2T00139205001, GSBRNA2T00130425001, GSBRNA2T00150971001, GSBRNA2T00065032001, GSBRNA2T00156098001, GSBRNA2T00007760001, GSBRNA2T00066570001, GSBRNA2T00143167001, GSBRNA2T00027623001, GSBRNA2T00150415001, GSBRNA2T00040398001, GSBRNA2T00090914001,…	0.00860128
Lysine degradation	A09100 Metabolism	12	564	177	23877	0.00106542	2.87018	[GSBRNA2T00012266001, GSBRNA2T00114120001, GSBRNA2T00100125001, GSBRNA2T00123442001, GSBRNA2T00027623001, GSBRNA2T00062120001, GSBRNA2T00072383001, GSBRNA2T00055407001, GSBRNA2T00082310001, GSBRNA2T00121212001, GSBRNA2T00120591001, GSBRNA2T00033460001]	0.00852336
Chaperones and folding catalysts	A09180 Brite Hierarchies	22	564	448	23877	0.00108642	2.07896	[GSBRNA2T00103058001, GSBRNA2T00016693001, GSBRNA2T00156503001, GSBRNA2T00121552001, GSBRNA2T00119652001, GSBRNA2T00120775001, GSBRNA2T00029762001, GSBRNA2T00140254001, GSBRNA2T00129851001, GSBRNA2T00108751001, GSBRNA2T00135742001, GSBRNA2T00093304001, GSBRNA2T00119851001, GSBRNA2T00107271001, GSBRNA2T00149688001, GSBRNA2T00148770001, GSBRNA2T00104156001, GSBRNA2T00143917001, GSBRNA2T00141030001,…	0.00831348
Glutathione metabolism	A09100 Metabolism	19	564	406	23877	0.00390828	1.9812	[GSBRNA2T00096592001, GSBRNA2T00145946001, GSBRNA2T00055407001, GSBRNA2T00113662001, GSBRNA2T00036837001, GSBRNA2T00120591001, GSBRNA2T00078103001, GSBRNA2T00130425001, GSBRNA2T00065032001, GSBRNA2T00156098001, GSBRNA2T00049770001, GSBRNA2T00066570001, GSBRNA2T00143167001, GSBRNA2T00066571001, GSBRNA2T00150415001, GSBRNA2T00057463001, GSBRNA2T00040398001, GSBRNA2T00135361001, GSBRNA2T00009527001]	0.0286607
Cysteine and methionine metabolism	A09100 Metabolism	23	564	536	23877	0.00464682	1.81662	[GSBRNA2T00047122001, GSBRNA2T00066145001, GSBRNA2T00110474001, GSBRNA2T00039593001, GSBRNA2T00002582001, GSBRNA2T00095912001, GSBRNA2T00154709001, GSBRNA2T00150940001, GSBRNA2T00036837001, GSBRNA2T00039592001, GSBRNA2T00023699001, GSBRNA2T00021707001, GSBRNA2T00052392001, GSBRNA2T00100979001, GSBRNA2T00138774001, GSBRNA2T00098196001, GSBRNA2T00057049001, GSBRNA2T00149831001, GSBRNA2T00022859001,…	0.0327136
Ubiquinone and other terpenoid-quinone biosynthesis	A09100 Metabolism	15	564	308	23877	0.00686513	2.06177	[GSBRNA2T00066145001, GSBRNA2T00105135001, GSBRNA2T00154709001, GSBRNA2T00043434001, GSBRNA2T00082786001, GSBRNA2T00024512001, GSBRNA2T00031741001, GSBRNA2T00138774001, GSBRNA2T00017871001, GSBRNA2T00124437001, GSBRNA2T00032032001, GSBRNA2T00122127001, GSBRNA2T00090917001, GSBRNA2T00067539001, GSBRNA2T00041456001]	0.0464716
Fatty acid degradation	A09100 Metabolism	11	564	195	23877	0.00686642	2.38813	[GSBRNA2T00120365001, GSBRNA2T00043891001, GSBRNA2T00114120001, GSBRNA2T00100125001, GSBRNA2T00134772001, GSBRNA2T00027623001, GSBRNA2T00021681001, GSBRNA2T00038172001, GSBRNA2T00072383001, GSBRNA2T00095199001, GSBRNA2T00033460001]	0.0447589
Cyanoamino acid metabolism	A09100 Metabolism	15	564	312	23877	0.007688	2.03534	[GSBRNA2T00149293001, GSBRNA2T00062630001, GSBRNA2T00128197001, GSBRNA2T00128201001, GSBRNA2T00104981001, GSBRNA2T00060776001, GSBRNA2T00139205001, GSBRNA2T00101635001, GSBRNA2T00017007001, GSBRNA2T00110703001, GSBRNA2T00150971001, GSBRNA2T00007760001, GSBRNA2T00138880001, GSBRNA2T00040192001, GSBRNA2T00121621001]	0.0483246

## Sheet: 6-8 stage_DEGs_KEGG
Term Name	MainClass	GeneHitsInSelectedSet	AllGenesInSelectedSet	GeneHitsInBackground	AllGenesInBackground	p-value	enrichFactor	GeneListInSelectedSets	corrected p-value(BH method)
alpha-Linolenic acid metabolism	A09100 Metabolism	8	210	188	23877	0.000269889	4.8383	[GSBRNA2T00090867001, GSBRNA2T00119629001, GSBRNA2T00077985001, GSBRNA2T00135385001, GSBRNA2T00027803001, GSBRNA2T00094910001, GSBRNA2T00027807001, GSBRNA2T00117873001]	0.00836655
Ascorbate and aldarate metabolism	A09100 Metabolism	10	210	209	23877	1.72426e-05	5.44019	[GSBRNA2T00115928001, GSBRNA2T00076418001, GSBRNA2T00026279001, GSBRNA2T00079392001, GSBRNA2T00079391001, GSBRNA2T00055407001, GSBRNA2T00137699001, GSBRNA2T00120591001, GSBRNA2T00032509001, GSBRNA2T00023808001]	0.000668149
Carbohydrate metabolism	A09100 Metabolism	68	210	3554	23877	1.26071e-10	2.17546	[GSBRNA2T00014247001, GSBRNA2T00134589001, GSBRNA2T00150685001, GSBRNA2T00077121001, GSBRNA2T00116587001, GSBRNA2T00076418001, GSBRNA2T00090876001, GSBRNA2T00111896001, GSBRNA2T00138909001, GSBRNA2T00032509001, GSBRNA2T00071611001, GSBRNA2T00067730001, GSBRNA2T00007760001, GSBRNA2T00019888001, GSBRNA2T00149551001, GSBRNA2T00053102001, GSBRNA2T00064714001, GSBRNA2T00071647001, GSBRNA2T00070209001,…	9.77052e-09
Pentose and glucuronate interconversions	A09100 Metabolism	29	210	582	23877	4.51861e-14	5.66546	[GSBRNA2T00014247001, GSBRNA2T00134589001, GSBRNA2T00150685001, GSBRNA2T00077121001, GSBRNA2T00111896001, GSBRNA2T00070188001, GSBRNA2T00085465001, GSBRNA2T00138909001, GSBRNA2T00059182001, GSBRNA2T00071611001, GSBRNA2T00150427001, GSBRNA2T00136136001, GSBRNA2T00067730001, GSBRNA2T00030817001, GSBRNA2T00064714001, GSBRNA2T00097760001, GSBRNA2T00112086001, GSBRNA2T00111771001, GSBRNA2T00153589001,…	7.00384e-12

## Sheet: Common_DEGs_KEGG
Term Name	MainClass	GeneHitsInSelectedSet	AllGenesInSelectedSet	GeneHitsInBackground	AllGenesInBackground	p-value	enrichFactor	GeneListInSelectedSets	corrected p-value(BH method)	up	down
alpha-Linolenic acid metabolism	A09100 Metabolism	6	150	188	23877	0.0012325	5.08021	[GSBRNA2T00090867001, GSBRNA2T00077985001, GSBRNA2T00027803001, GSBRNA2T00094910001, GSBRNA2T00027807001, GSBRNA2T00117873001]	0.0262934	1	5
Ascorbate and aldarate metabolism	A09100 Metabolism	9	150	209	23877	7.26065e-06	6.85464	[GSBRNA2T00115928001, GSBRNA2T00076418001, GSBRNA2T00026279001, GSBRNA2T00079391001, GSBRNA2T00055407001, GSBRNA2T00137699001, GSBRNA2T00120591001, GSBRNA2T00032509001, GSBRNA2T00023808001]	0.000232341	2	7
Carbohydrate metabolism	A09100 Metabolism	54	150	3554	23877	1.23057e-10	2.4186	[GSBRNA2T00014247001, GSBRNA2T00134589001, GSBRNA2T00150685001, GSBRNA2T00077121001, GSBRNA2T00116587001, GSBRNA2T00076418001, GSBRNA2T00111896001, GSBRNA2T00138909001, GSBRNA2T00032509001, GSBRNA2T00071611001, GSBRNA2T00067730001, GSBRNA2T00007760001, GSBRNA2T00053102001, GSBRNA2T00064714001, GSBRNA2T00071647001, GSBRNA2T00112086001, GSBRNA2T00023872001, GSBRNA2T00090999001, GSBRNA2T00144446001,…	5.25041e-09	16	38
Flavonoid biosynthesis	A09100 Metabolism	5	150	137	23877	0.0017587	5.80949	[GSBRNA2T00129952001, GSBRNA2T00140359001, GSBRNA2T00136074001, GSBRNA2T00048673001, GSBRNA2T00107166001]	0.032159	5	0
Galactose metabolism	A09100 Metabolism	7	150	242	23877	0.000868374	4.60438	[GSBRNA2T00023872001, GSBRNA2T00081032001, GSBRNA2T00086128001, GSBRNA2T00053102001, GSBRNA2T00071647001, GSBRNA2T00071648001, GSBRNA2T00021776001]	0.0222304	5	0
Pentose and glucuronate interconversions	A09100 Metabolism	28	150	582	23877	0	7.65814	[GSBRNA2T00014247001, GSBRNA2T00134589001, GSBRNA2T00150685001, GSBRNA2T00077121001, GSBRNA2T00111896001, GSBRNA2T00070188001, GSBRNA2T00085465001, GSBRNA2T00138909001, GSBRNA2T00059182001, GSBRNA2T00071611001, GSBRNA2T00150427001, GSBRNA2T00136136001, GSBRNA2T00067730001, GSBRNA2T00064714001, GSBRNA2T00097760001, GSBRNA2T00112086001, GSBRNA2T00111771001, GSBRNA2T00153589001, GSBRNA2T00022521001,…	0	2	26
